# Supplementary material for: Factors associated with pregnancy-related anxiety in Tanzanian women: a cross sectional study
Source: PubMed Central journal article supplement — BMJ Open. 2018 Jun 4;8(6):e020056. doi: 10.1136/bmjopen-2017-020056 (PMC5988139; doi:10.1136/bmjopen-2017-020056), 2018-06-04
Supplement: bmjopen-2017-020056.draft_revisions.pdf [file bmjopen-2017-020056.draft_revisions.pdf]

# BMJ Open

BMJ Open is committed to open peer review. As part of this commitment we make the peer review history of every article we publish publicly available.

When an article is published we post the peer reviewers' comments and the authors' responses online. We also post the versions of the paper that were used during peer review. These are the versions that the peer review comments apply to.

The versions of the paper that follow are the versions that were submitted during the peer review process. They are not the versions of record or the final published versions. They should not be cited or distributed as the published version of this manuscript.

BMJ Open is an open access journal and the full, final, typeset and author-corrected version of record of the manuscript is available on our site with no access controls, subscription charges or pay-per-view fees (<http://bmjopen.bmj.com>).

If you have any questions on BMJ Open's open peer review process please email [info.bmjopen@bmj.com](mailto:info.bmjopen@bmj.com)

# BMJ Open

## Factors associated with pregnancy-related anxiety in Tanzanian Women: a cross sectional study

|                                 |                                                                                                                                                                                                                                                                                                                                                                                                                                                                                                                                                                                                                           |
|---------------------------------|---------------------------------------------------------------------------------------------------------------------------------------------------------------------------------------------------------------------------------------------------------------------------------------------------------------------------------------------------------------------------------------------------------------------------------------------------------------------------------------------------------------------------------------------------------------------------------------------------------------------------|
| Journal:                        | <i>BMJ Open</i>                                                                                                                                                                                                                                                                                                                                                                                                                                                                                                                                                                                                           |
| Manuscript ID                   | bmjopen-2017-020056                                                                                                                                                                                                                                                                                                                                                                                                                                                                                                                                                                                                       |
| Article Type:                   | Research                                                                                                                                                                                                                                                                                                                                                                                                                                                                                                                                                                                                                  |
| Date Submitted by the Author:   | 10-Oct-2017                                                                                                                                                                                                                                                                                                                                                                                                                                                                                                                                                                                                               |
| Complete List of Authors:       | Wall, Vanessa; University of Calgary, Faculty of Nursing<br>Premji, Shahirose; University of Calgary, Faculty of Nursing; University of Calgary Cumming School of Medicine, Community Health Sciences<br>Letourneau, Nicole; University of Calgary, Faculty of Nursing; University of Calgary Cumming School of Medicine, Pediatrics, Psychiatry and Community Health Sciences<br>McCaffrey, Graham; University of Calgary, Faculty of Nursing<br>Nyanza, Elias; Catholic University of Health and Allied Sciences, School of Public Health; University of Calgary, Community Health Sciences, Cumming School of Medicine |
| <b>Primary Subject Heading</b>: | Global health                                                                                                                                                                                                                                                                                                                                                                                                                                                                                                                                                                                                             |
| Secondary Subject Heading:      | Public health, Mental health                                                                                                                                                                                                                                                                                                                                                                                                                                                                                                                                                                                              |
| Keywords:                       | PRIMARY CARE, PUBLIC HEALTH, PERINATOLOGY                                                                                                                                                                                                                                                                                                                                                                                                                                                                                                                                                                                 |
|                                 |                                                                                                                                                                                                                                                                                                                                                                                                                                                                                                                                                                                                                           |

SCHOLARONE™  
Manuscripts

only

Running head: PREGNANCY RELATED ANXIETY IN TANZANIA

1

**Title:** Factors Associated with Pregnancy-Related Anxiety in Tanzanian Women: a cross sectional study

**Authors:** Vanessa Wall<sup>1</sup>, Shahirose Sadrudin Premji<sup>1,2,§</sup>, Nicole Letourneau<sup>1,2,3</sup>, Graham McCaffrey<sup>1</sup>, Elias Charles Nyanza<sup>2,4</sup>

<sup>1</sup> Faculty of Nursing, University of Calgary, Calgary, AB, CANADA

<sup>2</sup> Community Health Sciences, Cumming School of Medicine, University of Calgary, Calgary, AB, CANADA

<sup>3</sup> Pediatrics and Psychiatry, Cumming School of Medicine, University of Calgary, AB, CANADA

<sup>4</sup> School of Public Health, Catholic University of Health and Allied Sciences, Bugando Area, Mwanza, Tanzania

§ Corresponding author

**Correspondence to:**

Shahirose Premji

Faculty of Nursing, University of Calgary

2500 University Drive NW

Calgary, Alberta, CANADA T2N 1N4

Email: [premjis@ucalgary.ca](mailto:premjis@ucalgary.ca)

Tel: 403.220.4081

**Keywords:** Pregnancy-related anxiety; anxiety; women's health; pregnancy; global health

**Word count:** 4,053

## PREGNANCY RELATED ANXIETY IN TANZANIA

2

**ABSTRACT**

**Objective:** To identify factors predictive of pregnancy-related anxiety (PRA) among women in Mwanza, Tanzania.

**Design:** A cross sectional study was used to explore the relationship between psychosocial health and preterm birth.

**Setting:** Antenatal clinics in the Ilemela and Nyamagana districts of Mwanza, Tanzania.

**Participants:** Pregnant women less than or equal to 32 weeks' gestational age (N=212) attending the two antenatal clinics.

**Measures:** PRA was measured using a revised version of the 10-item PRA Questionnaire (PRA-Q). Predictive factors included social support (Multidimensional Scale of Perceived Social Support), stress (Perceived Stress Scale), depression (Edinburg Postpartum Depression Scale), and socio-demographic data. Bivariate analysis permitted variable selection while multiple linear regression analysis enabled identification of predictive factors of PRA.

**Results:** Twenty-five percent of women in our sample scored 13 or higher (out of a possible 30) on the PRA-Q. Perceived stress, active depression, and number of people living in the home were the only statistically significant predictors of PRA in our sample.

**Conclusions:** Our findings were contrary to most current literature which notes socio-economic status and social support as significant factors in PRA. A greater understanding of the experience of PRA within the social cultural context of low- and middle-income countries and its predictive factors is needed in low- and middle-income countries to support the development of PRA prevention strategies.

## ARTICLE SUMMARY

### Strengths and limitations of this study

- This is the first study to examine predictive factors for PRA among pregnant women in Tanzania.
- This study identifies the importance of cultural context when examining PRA among pregnant women in LMIC.
- There are no standardized screening tools for PRA or commonly accepted categorization methods for the tools available making it difficult to compare findings between studies or compare characteristics between levels of severity of PRA. However, findings of this study were stable across continuous and categorical PRA measurements.
- Convenience sampling was employed and consequently results cannot be generalized to all pregnant women in the Ilemela and Nyamagana districts of Tanzania.
- The lack of comparable studies in LMIC makes it difficult to identify potential anomalies in these findings.

## INTRODUCTION

Pregnancy-related anxiety (PRA) is characterized by anxiety pertaining to the pregnancy, including labour and delivery, the fetus or infant's health, the mother's health, accessibility and quality of health care resources, and/or the ability to parent.[1-4] PRA is a distinct and different phenomenon than general anxiety occurring concurrent to pregnancy [1] and has stronger correlations to preterm birth (PTB) (birth at less than 37 weeks' gestation) than more commonly studied general anxiety or depression.[2, 4-6] An estimated 85% of PTB globally, occur in Africa and Asia.[7] Africa has the highest rate of PTB where some regions reach 17.5%.[7] approximately 14.3% of births are preterm in Eastern Africa.

PRA prevalence estimates in high-income countries range from 6 - 29%.[8-11] however, high-risk populations tend to yield higher rates of PRA.[9] Among a sample of pregnant women from Tanzania (a low-income country [12]), in the city of Mwanza, the rate of PRA was 18.3%, which was associated with antenatal depression (odds ratio 1.36, 95% confidence interval 1.23 to 1.5).[13, 14] In the lower-middle income country of India,[12] in the city of Kerala, prevalence of severe PRA ranged from 0.4% to 22% depending on the trimester, but at least 74% of Indian women experienced moderate levels of PRA in all trimesters.[15]

Within high-income countries, non-Caucasian ethnicity, low family income, and limited social supports are consistently noted as prominent risk factors for PRA.[2, 16, 17] In low-and-middle-income countries (LMIC), it is unknown if these remain the most prominent risk factors for PRA. In Tanzania, 67% of the population falls below the poverty line and 99% of Tanzanians are of African ethnicity.[18] Moreover, 69% of the population lives in rural areas and there are only

## PREGNANCY RELATED ANXIETY IN TANZANIA

5

1  
2  
3 three physicians per 100000 people [18] which may result in concerns related to healthcare  
4 resources which further contributes to the potential for PRA. As such, it seems reasonable to  
5 anticipate PRA prevalence in low- and middle-income countries such as Tanzania may be  
6 comparable to PRA rates in high-risk populations within high-income countries.  
7  
8  
9

10  
11  
12  
13  
14 Unfortunately, there is a dearth of literature examining PRA in LMIC; only 8% of LMIC are  
15 represented in literature regarding all common mental illness during the prenatal period.[19]  
16  
17 This lack of contextually relevant literature makes it difficult to develop practice guidelines or  
18 protocols to address PRA in these countries. Moreover, in many LMIC like Tanzania, many  
19 women come from similar socioeconomic backgrounds and it remains unclear why some women  
20 develop severe PRA and others do not. Alternative theories of stress can offer insight about  
21 stressful events, such as PRA, in unexamined populations. Lazarus and Folkman [20] suggest  
22 that stress occurs when people are faced with a situation they deem a possible threat and cannot  
23 access the resources required to manage the threat. In accordance with this theory, the  
24 differences in sociocultural context between high-income countries and LMIC may be that LMIC  
25 hold different risk factors for PRA than high-income countries. Differences in countries' public  
26 health education may alter the amount of anxiety women have about the physical symptoms of  
27 pregnancy as they are more or less aware of what to expect and what is normal.[21] Moreover,  
28 difference in accessibility to health care services can affect women's appraisal of whether or not  
29 adequate prenatal care is attainable. This doubt can increase concerns about pregnancy  
30 complications, delivery, or infant care, particularly if access to healthcare is limited or women  
31 have had previous negative healthcare experiences.[2] Consequently, factors associated with  
32 PRA in high-income countries should not be assumed true for LMIC.  
33  
34  
35  
36  
37  
38  
39  
40  
41  
42  
43  
44  
45  
46  
47  
48  
49  
50  
51  
52  
53  
54  
55  
56  
57  
58  
59  
60

1  
2  
3  
4  
5 We used the Social Ecology Model for Health Promotion [22] to identify predictive factors. The  
6  
7 Model proposes health promotion is most effective when we consider the interaction of peoples'  
8  
9 attributes and both their physical environment and social climate.[22] As people change their  
10  
11 environment it will contribute to their change in health. In this model, the notion of  
12  
13 "environment" is multidimensional and can include tangible attributes (i.e. upsetting events in  
14  
15 the community) or social constructs, objective qualities or perceived qualities, and/or social  
16  
17 climate or physical surroundings.[22] Additionally, the Social Ecology Model for Health  
18  
19 Promotion asserts that human-environment interactions should be considered on both small and  
20  
21 large scales (e.g. individuals, families, communities, and populations).[22] Therefore, in order to  
22  
23 thoroughly examine factors associated with PRA in women in the low-income country of  
24  
25 Tanzania, we examine attributes of pregnant women, their families, their communities and their  
26  
27 environment. We sought to answer the research question: what predictive factors are associated  
28  
29 with PRA for women attending antenatal clinics in the Ilemela and Nyamagana districts of  
30  
31 Tanzania, Africa.  
32  
33  
34  
35  
36  
37  
38  
39

## 40 **METHODS**

### 41 **Study design**

42  
43 We used data collected during women's first attendance at prenatal clinic (gestational age 6-32  
44  
45 weeks). These women were enrolled in a prospective longitudinal study that explored the  
46  
47 relationship between psychosocial health and preterm birth among women in Mwanza,  
48  
49 Tanzania.[23] A collaborative research team comprised of faculty and graduate students, from  
50  
51 University of Calgary and Catholic University of Health and Allied Sciences (CUHAS) in  
52  
53  
54  
55  
56  
57  
58  
59  
60



## PREGNANCY RELATED ANXIETY IN TANZANIA

7

Mwanza, Tanzania and local registered nurses who also served as field workers, collected data at four time points throughout participants' pregnancies (first trimester, early second trimester, late second trimester, and early third trimester). During the first time point, women were coached to return to the clinic every six weeks until 32 weeks gestation, then were seen at delivery and again 6 weeks postpartum.[23] At each point of contact participants received a perinatal mental health assessment; private space was provided to complete questionnaires.[23] The Conjoint Health Research Ethics Board at the University of Calgary (approval numbers REB 13-0399 and 16-1579), and the Catholic University of Health and Allied Sciences/Bugando Medical Centre Research Ethical Committee (CREC/062/2013) approved these studies (i.e., primary and secondary analysis). The larger study was also approved by the Tanzania National Institute of Medical Research - Lake Zone Institutional Review Board (MR/53/100/254 and MR/53/100/160).

**Setting and participants**

A convenience sample of 212 women was recruited, using a systematic sampling approach, from antenatal clinics in the Ilemela (n=72) and Nyamagana (n=140) districts of Tanzania from June 2013-January 2015.[23] The sample was comprised of women who spoke Swahili or English, and were 32 weeks' gestational age or less at the time of enrollment based on women's last menstrual period. Adolescent mothers were included as they were classified as emancipated minors.[23] Women who self-reported co-morbidities such as hypertension, diabetes, malaria or human-immunodeficiency virus (HIV) were not excluded due to the prevalence of these illnesses. Recent work within this sample revealed that the high prevalence of HIV coupled with minimal health knowledge has resulted in women with and without HIV sharing similar concerns

## PREGNANCY RELATED ANXIETY IN TANZANIA

8

1  
2  
3 about the illness and potential effects on their baby.[21] The nurse in-charge was the first to  
4 approach and invite participation from eligible women in the waiting room of the antenatal  
5 clinics. A member of the research team then obtained informed consent from women who agreed  
6 to participate (see image file for Figure 1 Recruitment flow diagram).[23]  
7  
8  
9  
10  
11  
12  
13

**Data collection**

14  
15  
16 A general questionnaire was used to collect socio-demographic data including age, education,  
17 income, and co-morbidities.[23] PRA was measured using a revised version of the 10-item PRA  
18 Questionnaire (PRA-Q) that assesses feelings about health during pregnancy, infant or baby's  
19 health, and labour and delivery.[24, 25] Each item was a 4-point Likert scale of 0-3; a  
20 cumulative score was given out of a possible 30 points.[24] Information on household incomes  
21 was difficult to obtain due to cultural norms and traditions.[13] Consequently, socio-economic  
22 welfare was assessed using a Likert scale questionnaire focused on the acquisition of assets (e.g.  
23 car, motorcycle, bicycle), living standards (e.g., access to water, and number of meals eaten per  
24 day), and other wealth status (e.g., employment).[13, 26] Most questions were dichotomous (yes  
25 or no) with an associated score of one or two with the exception of three questions; roof type and  
26 meals per day provided three possible answers with associated scores of one to three and water  
27 source had five possible answers with scores from one to five. The final score on the Socio-  
28 Economic Welfare Questionnaire (SEW-Q) was a sum of all the answers for a maximum  
29 possible score of 29. Social support was rated using the 12-item Multidimensional Scale of  
30 Perceived Social Support.[27] This scale includes questions about the relationship of supportive  
31 people to the participant, the perceived level of support the participant receives from her support  
32 network, and the extent to which the participant feels cared for by the people closest to her.[27]  
33  
34  
35  
36  
37  
38  
39  
40  
41  
42  
43  
44  
45  
46  
47  
48  
49  
50  
51  
52  
53  
54  
55  
56  
57  
58  
59  
60

1  
2  
3 This scale has high internal consistency reliability (Cronbach's  $\alpha > 0.90$ ). Perceived stress (PS)  
4 was measured with a 10-item tool (4-point Likert scale) examining the frequency of increased  
5 stress, perceived level of control over their life and stressful events, and ability to cope with  
6 stress. A cumulate score was given out of a possible 40 with higher scores indicating increased  
7 stress.[28] Evaluation of the PS scale has consistently shown adequate reliability (Cronbach's  $\alpha$   
8  $> 0.70$ ) and has been used with a variety of populations and translated into 25 languages.[29]  
9  
10 However, empirical evaluation has not been completed on these translated versions or with  
11 populations other than college students or the employed.[29] The Edinburgh Postnatal  
12 Depression Scale (EPDS), a self-reported 10-item scale was used to screen for depression and  
13 identify at-risk mothers. Empirical evaluation demonstrates good reliability (Cronbach's  $\alpha=0.83$ )  
14 [30]. This scale has been extensively tested in both pregnant and postnatal populations and is  
15 widely accepted for global populations with translations in several languages.[31, 32] It should  
16 be acknowledged that none of the tools used in this study have been tested on the population of  
17 interest.  
18  
19  
20  
21  
22  
23  
24  
25  
26  
27  
28  
29  
30  
31  
32  
33  
34  
35  
36  
37

### 38 **Statistical analysis**

39  
40 For bivariate analysis, variables of interests (Table 1) were selected based on factors identified in  
41 the current literature, the theory of cognitive appraisal,[20] and the social ecological model for  
42 health promotion.[22] Bivariate analyses identified which continuous variables had a relationship  
43 with the PRA total score. Nominal variables with more than two values (i.e. marital status,  
44 occupation) were converted into dichotomous variables (i.e. in relationship or not) and analyzed  
45 with Mann-Whitney U tests as PRA was not normally distributed. Converted variables found to  
46 have a significant association with PRA total score were then expanded and each variable's  
47  
48  
49  
50  
51  
52  
53  
54  
55  
56  
57  
58  
59  
60

**Table 1. Variable selected for bivariate analysis**

| Individual                       | Family                                   | Community                                   |
|----------------------------------|------------------------------------------|---------------------------------------------|
| EPDS Score *                     | Sum of SEW-Q Score *                     | Events in the Community<br>Upsetting to You |
| Age of participant               | Gravidity                                | Perceived Social Support<br>Score           |
| Mother Born in Mwanza            | Current Marital Status **                | Healthcare Facility                         |
| Mother's highest level education | Mother's Main Occupation                 |                                             |
| PS Score *                       | Father's Main Occupation                 |                                             |
| History of Hypertension          | Father's Highest Level of<br>Education * |                                             |
| History of Depression *          | Total Number of Pregnancies              |                                             |
| History of Gestational Diabetes  | Total Number of Live Births              |                                             |
| History of Schistosomiasis       | Previously Had Preterm *                 |                                             |
| History of Syphilis              | Previously Had a Male Baby               |                                             |
| History of HIV *                 | Number of People Living in<br>the Home * |                                             |
| History of Malaria               | Planned Pregnancy *                      |                                             |
| History of Anemia                | Gestational Age at First Visit           |                                             |

\*Predictor variable in regression analysis

\*\*Married and Separated were dichotomized predictor variables in regression analysis

original values (i.e. coupled, married, common-law, divorced, etc.) were analyzed as separate dichotomous variables using Mann-Whitney U test for an association with PRA total score.

Ordinal variables (i.e. education) were analyzed with Kruskal-Wallis tests as PRA was not normally distributed. Variables with a significance level of  $p \leq 0.25$  in the bivariate analyses were included in the multiple linear regression analyses.[33] Variables known to have clinical relevance such as socio-economic welfare score and marital status were also included regardless of their statistical significance.

## PREGNANCY RELATED ANXIETY IN TANZANIA

11

1  
2  
3 Multiple linear regression modeling was employed with PRA total score as the dependent  
4 variable. In order to assess variables associated with the most severe cases of PRA, PRA scores  
5 were divided into quartiles and only cases with PRA scores in the top and bottom quartiles were  
6 analyzed in this multiple regression analyses. Given the rigorous variable selection process, a  
7 backwards input method was used. Variables were then removed starting with the variables that  
8 were least statistical significant. A two-sided  $p$  value of  $\leq 0.05$  was considered statistically  
9 significant for all multiple linear regression analyses. Residual of error values were then  
10 examined in a scatter plot, Q-Q plot, and histogram to verify the assumptions of normal  
11 distribution and homoscedasticity were satisfied.  
12  
13  
14  
15  
16  
17  
18  
19  
20  
21  
22  
23  
24  
25

26 We conducted supplemental analyses to provide a comparison with the primary analyses which  
27 only used cases with PRA scores in the first and fourth quartile. The first supplemental analysis  
28 employed the same multiple linear regression process as the primary analysis but included all  
29 PRA scores. We employed the same variable selection method described in the primary analysis.  
30 Currently there is no empirically tested, or commonly accepted, method for operationalizing  
31 PRA-Q scores into levels of severity. Thus, our primary analysis maintained rigor by leaving  
32 these scores as a continuous variable. To evaluate how our results may compare to studies that  
33 have categorized PRA scores, we completed a second supplemental analysis. Using all 212  
34 cases, PRA scores were dichotomized in accordance with the work of Fairlie et al.;[34] high-  
35 anxiety was defined as three or more answers of “3” (very much) on the PRA-Q. All other scores  
36 were categorized as low-moderate anxiety. Bivariate and  $\chi^2$  tests were conducted where  
37 appropriate, to identify factors associated with high, or low-moderate PRA.  
38  
39  
40  
41  
42  
43  
44  
45  
46  
47  
48  
49  
50  
51  
52  
53  
54  
55  
56  
57  
58  
59  
60

## RESULTS

The sample was comprised of 72 women from the Ilemela district and 140 women from the health center in Nyamagana ( $N=212$ ) with a median age of 26 years (range 16 – 44 years). Approximately three-quarters of participants (78.2%) were multiparous, the majority of participants were in a relationship (89.6%), and over three-quarters of participants (77.8%) identified that they were married. Although nearly all participants (97.2%) had some level of formal education, most had only completed primary school (64.6%). Socio-economic status was higher than expected with 57.1% of participants scoring 12 or better (out of 18) on the SEW-Q and 9.0% scoring five or less. PRA-Q scores ranged from 0-24 with a median score of 10 (inter quartile range (IQR)=8-13). When PRA was dichotomized as “high” and “low-moderate” categories, 6.1% of participants ( $n=13$ ) had high anxiety. Table 2 shows the demographic characteristics and PRA scores of the study’s sample.

**Table 2. Demographic characteristics**

|                                     | Total<br>N=212 | Nyamaganan<br>n=140 (66%) | Ilemelan<br>n=72 (34%) |
|-------------------------------------|----------------|---------------------------|------------------------|
|                                     | Median (range) | Median (range)            | Median (range)         |
| Age (years)                         | 26 (16-44)     | 33 (16-44)                | 29 (17-40)             |
| GA (weeks) at 1 <sup>st</sup> visit | 24 (6-32)      | 23 (6-32)                 | 26 (8-32)              |
|                                     | N (%)          | n (%)                     | n (%)                  |
| Primiparous                         | 50 (21.8)      | 33 (21.6)                 | 17 (22.7)              |
| Born in Mwanza                      | 71 (33.5)      | 52 (37.1)                 | 19 (26.4)              |
| Primary Education                   | 137 (64.2)     | 104 (74.3)                | 33 (45.8)              |
| > Primary Education                 | 69 (32.5)      | 33 (23.6)                 | 36 (50.0)              |
| Married                             | 165 (77.8)     | 105 (75.0)                | 60 (85.7)              |
| Employed                            | 138 (60.3)     | 92 (60.1)                 | 46 (61.3)              |
|                                     | Median (range) | Median (range)            | Median (range)         |
| Sum of SEWQ Scores                  | 12 (2-18)      | 12 (2-18)                 | 13 (2-16)              |
| Perceived Social Support Score      | 59 (20-84)     | 59 (21-84)                | 59 (20-80)             |
| Perceived Stress Score              | 19 (1-36)      | 18 (1-36)                 | 21 (8-33)              |
| PRA-Q total Score                   | 10 (0-24)      | 10 (0-24)                 | 12 (2-24)              |

## PREGNANCY RELATED ANXIETY IN TANZANIA

13

GA=gestational age; SEWQ=Socio Economic Welfare Questionnaire; PRA-Q=pregnancy-related anxiety questionnaire

In the primary analysis, PRA scores were quartiled and only cases from the first and fourth quartile were used (n=90). The first quartile scores ranged from 0-7 and the fourth quartile scores ranged from 13-24. The variables included in the multiple linear regression analyses are shown in Table 1. The results of the primary regression (Table 3) indicated that PS score, EPDS score, and number of people living in the home were significant predictors of PRA ( $R^2=0.339$ ,  $F(3,74)=12.657$ ,  $p=0.000$ ) (adjusted  $R^2=0.312$ ). PS score and EPDS score were positively associated with PRA score, whereas the number of people living in the home was negatively associated with PRA score. There was no indication of multicollinearity as each of these predictors met the criteria for statistical significance ( $p\leq 0.05$ ), had a Variance Inflation Factor of less than 2, and a Tolerance greater than 0.05. While the EPDS is supposed to measure postpartum depression, there is concern the scale contains an anxiety subscale.[35] To account for a potential spurious relationship between this anxiety subscale and PRA, the EPDS scores were recalculated, excluding the scores for two anxiety-related questions. Bivariate analysis indicated the recalculated EPDS scores and full EPDS scored shared the same correlation with PRA score ( $r_s=0.511$ ,  $p=0.000$ ). When the linear regression modeling was re-run using the recalculated EPDS scores the model summary was only marginally changed ( $R^2=0.338$ ,  $F(3,74)=2.607$ ,  $p=0.000$ ) (adjusted  $R^2=0.311$ ). The total of the two anxiety questions from the EPDS was analyzed as a separate variable. This variable showed a positive correlation with PRA scores ( $r_s=0.422$ ,  $p=0.000$ ) but was not a statistically significant predictor in the regression models.

**Table 3. Regression model of factors associated with PRA score**

|                                 | <i>B</i> | <i>SE B</i> | $\beta$ | <i>t</i> | <i>p</i> |
|---------------------------------|----------|-------------|---------|----------|----------|
| PS Score                        | 0.306    | 0.121       | 0.328   | 2.527    | 0.014    |
| EPDS Score                      | 0.328    | 0.136       | 0.316   | 2.416    | 0.018    |
| Number of people living in home | -0.718   | 0.342       | -0.204  | -2.102   | 0.039    |

In the first supplemental analysis (using all cases, n=212), PRA had a significant association ( $p \leq 0.05$ ) with EPDS score, recalculated EPDS score, PS, SEW-Q score, a history of HIV, and healthcare facility. The results of this regression analysis were similar to the regression modeling using the first and fourth quartile PRA scores; results indicated PS score and EPDS score were statistically significant predictors of PRA ( $R^2=0.196$ ,  $F(2,209)=25.394$ ,  $p=0.000$ ) (adjusted  $R^2=0.188$ ). Both PS score and EPDS score maintained a positive correlation with PRA. This regression was re-run using the recalculated EPDS scores and the model summary was again only marginally different ( $R^2=0.195$ ,  $F(2,209)=25.243$ ,  $p=0.000$ ) (adjusted  $R^2=0.187$ ) with the same final predictors.

In the second supplemental bivariate analysis with dichotomized PRA, the number of people living in the home, PS score, and EPDS scores showed significant associations ( $p \leq 0.05$ ) with high or low-moderate PRA. Fisher's Exact test showed PRA to have a significant association with if the mom was born in Mwanza, and if the pregnancy was planned. Eighty-five percent ( $n=11$ ) of the participants with high anxiety had not planned their pregnancy.  $\chi^2$  analysis showed presence of depression (an EPDS score of 13 or higher [31]) was two-fold in women with a high PRA scores (53.8%) compared to women with low PRA scores (27.1%) ( $p=0.04$ ). When EPDS scores were recalculated without the anxiety questions, the presence of depression remained about two-fold in women with high PRA scores compared to women with low PRA scores



(23.1% and 11.6% respectively). However, these results were not statistically significant ( $p=0.203$ ).

## DISCUSSION

Twenty-five percent of women in our sample scored 13 or higher (out of a possible 30) on the PRA-Q, and 6.1% of participants met the threshold for “high anxiety”.[34] Regardless of how PRA was operationalized (continuous, dichotomized, or limited to only the highest and lowest scores), EPDS score and PS score consistently had a positive correlation with PRA and were significant predictors in the regression models. Current literature substantiates the identified association between depression and PRA.[1, 13] Pregnant women more commonly experience co-morbid anxiety and depression rather than one of these afflictions alone.[13, 36] However, there appears to be limited understanding of why this comorbidity exists and which develops first, depression or anxiety. Consideration of the Theory of Stress, Appraisal, and Coping [20] combined with the nuances of this sample’s cultural context provides insight in this inquiry. Lazarus and Folkman [20] posit that stress results when an event is appraised as a possible threat to one’s well-being and the resources to mitigate the event are deemed unattainable. Moreover, factors such as novelty and time proximity to the event can affect the perception of the threat’s severity.[20] In accordance with this theory, the lack of basic health knowledge, coupled with restricted access to healthcare facilities, and the low socio-economic standing of most Tanzanians creates an environment where pregnancy could commonly result in stress or anxiety.[18, 21] Moreover, social customs in Tanzania deter the discussion of personal matters with anyone: friends, family, or spouses.[21] A phenomenological study used a subsample of our participants to explore moderate to severe PRA. This study identified common feelings of

## PREGNANCY RELATED ANXIETY IN TANZANIA

16

1  
2  
3 isolation and alienation amongst participants as their anxiety worsened and there was no  
4  
5 perceived acceptable forum to discuss their fears; ultimately, women endorsed the isolation  
6  
7 evolving into sadness.[21, 37] Even in cases where women surrounded themselves with family,  
8  
9 there was still a reluctance to discuss their concerns. Our primary analysis revealed a negative  
10  
11 correlation between number of people living in the home and PRA. More people in the home  
12  
13 increases the likelihood that the mother has someone she may feel comfortable talking to. It is  
14  
15 therefore conceivable that in this populace, severe PRA may trigger an internal conflict of  
16  
17 wanting to express these fears while worrying that this is not acceptable, which results in feelings  
18  
19 of isolation and subsequent depression.  
20  
21  
22  
23  
24  
25

26 Interestingly, the factors most commonly associated with PRA in current literature did not hold  
27  
28 significance in this study. Socio-economic welfare score showed a significant correlation with  
29  
30 PRA only when all participants were used and PRA was a continuous variable. When PRA  
31  
32 scores were dichotomized or only participants with the PRA scores in the first and fourth quartile  
33  
34 were used, the correlation with socio-economic welfare score lost statistical significance, and did  
35  
36 not show significant predictive properties. Perceived social support score, marital status, and  
37  
38 mother's occupation also failed to have a significant association. Active depression is the only  
39  
40 factor found to predict PRA in our study which is also consistently correlated to PRA in current  
41  
42 literature.[1, 13] Our findings are remarkably contrary to the current literature, which  
43  
44 consistently lists social supports, ethnicity, and economic status as key risk factors.[2, 16, 17]  
45  
46  
47 These gross variations from current research may reflect the limited research available from  
48  
49 LMIC.[19] Moreover, our findings serve as a caution to generalize findings on PRA from high-  
50  
51 income countries to populations in LMIC.  
52  
53  
54  
55  
56  
57  
58  
59  
60

1  
2  
3  
4  
5  
6  
7  
8  
9  
10  
11  
12  
13  
14  
15  
16  
17  
18  
19  
20  
21  
22  
23  
24  
25  
26  
27  
28  
29  
30  
31  
32  
33  
34  
35  
36  
37  
38  
39  
40  
41  
42  
43  
44  
45  
46  
47  
48  
49  
50  
51  
52  
53  
54  
55  
56  
57  
58  
59  
60

Despite the vast differences in culture and socioeconomic standing it makes sense that globally, women can experience the same condition, PRA, for different reasons. The notion of novelty can critically change the perceived threat in an event.[20] Pregnancy may be uniquely novel in its accompaniment of physiological and psychological emotional investment coupled with the distinct outcome of creating human life. One possible explanation is that pregnancy may hold an unparalleled element of novelty (thus propensity to induce anxiety) regardless of a women's background or gravidity. Differences in social norms and fundamental values, however, may change what someone considers threatening or stressful.[20] In the context of this study, socio-cultural norms such as dynamics between men and women may change the effect of social supports on PRA scores. The subsample of women enrolled in the phenomenological study of PRA often described their husbands growing distant during the pregnancy, which had an exacerbating effect on their anxiety rather than calming [21]. Many of the fears voiced by women in Tanzania were due to limited basic health and pregnancy knowledge; many times normal sensations resulted in fear of death for the mother or baby.[21] These differences in findings outline the need for more research exploring the notion of PRA in LMIC and between LMIC and high-income countries.

### Limitations

Convenience sampling was employed and consequently results cannot be generalized to all pregnant women in the Ilemela and Nyamagana districts of Tanzania. Moreover, the lack of comparable studies in LMIC makes it difficult to identify potential anomalies in these findings. There are no standardized screening tools for PRA or commonly accepted categorization

1  
2  
3 methods for the tools available [38] making it difficult to compare findings between studies or  
4  
5 compare characteristics between levels of severity of PRA. Moreover, within current literature  
6  
7 there is no empirically tested way to operationalize PRA scores. The PRA-Q examines broad  
8  
9 concepts of PRA making it an effective screening tool but difficult to identify severity of PRA or  
10  
11 clinical diagnoses.[38, 39] This was a secondary data analysis limiting variable options to those  
12  
13 already included in the longitudinal study. Findings in the regression modeling only explain 20-  
14  
15 34% of the change in PRA scores across our sample. Consequently, there are still significant  
16  
17 factors not identified in this study.  
18  
19  
20  
21  
22  
23

## 24 CONCLUSION

25  
26 Active depression is one of the only factors consistently correlated to PRA in both our study and  
27  
28 current literature. Given the socio-cultural differences between populations in high-income  
29  
30 countries and LMIC, the unique psychological complexities of pregnancy, and the personal  
31  
32 nature of how people assess events as stressful, findings should not be generalized across these  
33  
34 populations. Ultimately, more research is needed on PRA universally and the reason for  
35  
36 comorbidity between depression and PRA. In LMIC, before predictive factors and prevention  
37  
38 strategies can be identified, further fundamental exploration of PRA is needed to better  
39  
40 understand how this phenomenon fits within these socio-cultural settings.  
41  
42  
43  
44  
45  
46

47 **Contributions:** VW, and SSP worked together to develop the research question, study design,  
48  
49 and analytic plan. SSP, NL and GM provided consultation from the research design through to  
50  
51 the manuscript development, and directed the analysis of the study. ECN, local lead in Mwanza,  
52  
53  
54  
55  
56  
57  
58  
59  
60

## PREGNANCY RELATED ANXIETY IN TANZANIA

19

1  
2  
3 translated documents, obtained ethics approval, and supervised research assistants. All authors  
4  
5 have contributed to the work and approved the manuscript.  
6

7  
8 **Funding:** The University of Calgary Research Grant (URGC) Program, SEED Grant, funded the  
9  
10 larger quantitative study. VW's graduate studies was support by scholarships including Entrance  
11  
12 scholarship for Master of Nursing Program, Faculty of Nursing Graduate Entrance Scholarship,  
13  
14 Queens Elizabeth II Scholarship and Graduate Knowledge Translation Assistantship from  
15  
16 Faculty of Nursing.  
17

18  
19 **Acknowledgements:** The authors would like to thank the research team in Mwanza, Tanzania  
20  
21 who completed the larger quantitative study, including affiliates with the Catholic University of  
22  
23 Health and Allied Sciences. The primary author would like acknowledge the research team's  
24  
25 hard work and allowing the use of the data to complete this analysis. We would also like to thank  
26  
27 and acknowledge the women of Tanzania who took time to participate in the study and allowed  
28  
29 us to learn from their lives and experiences.  
30  
31

32  
33 **Competing interests:** None declared  
34

35  
36 **Ethics approval:** University of Calgary Conjoint Health Research Ethics Board (REB13-0399:  
37  
38 larger study; REB14-0660: this study; and REB14-0660-MOD-1: to include postpartum women)  
39  
40 and the Catholic University of Health and Allied Sciences.  
41

42  
43 **Data sharing statement:** The dataset generated during our study are not publicly available as  
44  
45 consent for secondary use was not obtained from study participants. Please contact the  
46  
47 corresponding author for additional information.  
48  
49  
50  
51  
52  
53  
54  
55  
56  
57  
58  
59  
60

**REFERENCES**

1. Huizink AC, Mulder EJ, Robles de Medina PG, *et al.* Is pregnancy anxiety a distinctive syndrome? *Early Hum Dev* 2004;79(2):81-91.
2. Dunkel Schetter C. Psychological science on pregnancy: stress processes, biopsychosocial models, and emerging research issues. *Annu Rev Psychol* 2011;62:531-58. doi: 10.1146/annurev.psych.031809.130727.
3. Dunkel Schetter C, Tanner L. Anxiety, depression and stress in pregnancy: implications for mothers, children, research, and practice. *Curr Opin Psychiatry* 2012;25(2):141-8. doi: 10.1097/YCO.0b013e3283503680.
4. Guardino CM, Dunkel Schetter C. Understanding pregnancy anxiety. *Zero to Three* 2014;35(3):12-22.
5. Glynn LM, Schetter CD, Hobel CJ, *et al.* Pattern of perceived stress and anxiety in pregnancy predicts preterm birth. *Health Psychol* 2008;27(1):43-51. doi: 10.1037/0278-6133.27.1.43
6. Rose MS, Pana G, Premji S. Prenatal maternal anxiety as a risk factor for preterm birth and the effects of heterogeneity on this relationship: a systematic review and meta-analysis. *Biomed Res Int* 2016;2016:8312158. doi: 10.1155/2016/8312158.
7. Beck S, Wojdyla D, Say L, *et al.* The worldwide incidence of preterm birth: a systematic review of maternal mortality and morbidity. *Bull World Health Organ* 2010;88(1):31-8. doi: 10.2471/BLT.08.062554.
8. Arch JJ. Pregnancy-specific anxiety: which women are highest and what are the alcohol-related risks? *Compr Psychiatry* 2013;54(3):217-28. doi: 10.1016/j.comppsy.2012.07.010.

- 1  
2  
3 9. Fleuriet KJ, Sunil TS. Perceived social stress, pregnancy-related anxiety, depression and  
4 subjective social status among pregnant Mexican and Mexican American women in south  
5 Texas. *J Health Care Poor Underserved* 2014;25(2):546-61. doi:  
6  
7 10.1353/hpu.2014.0092.  
8  
9
- 10 10. Jolly J, Walker J, Bhabra K. Subsequent obstetric performance related to primary mode  
11 of delivery. *Br J Obstet Gynaecol* 1999;106(3):227-32.  
12
- 13 11. Rubertsson C, Hellstrom J, Cross M, *et al.* Anxiety in early pregnancy: prevalence and  
14 contributing factors. *Arch Womens Ment Health* 2014;17(3):221-8.  
15
- 16 12. The World Bank [Internet]. World bank country and lending groups. World Bank Group;  
17 n.d. Available from: [https://datahelpdesk.worldbank.org/knowledgebase/articles/906519-](https://datahelpdesk.worldbank.org/knowledgebase/articles/906519-world-bank-country-and-lending-groups)  
18 [world-bank-country-and-lending-groups](https://datahelpdesk.worldbank.org/knowledgebase/articles/906519-world-bank-country-and-lending-groups) [accessed 5 October 2017]  
19
- 20 13. Rwakarema M, Premji SS, Nyanza EC, *et al.* Antenatal depression is associated with  
21 pregnancy-related anxiety, partner relations, and wealth in women in Northern Tanzania:  
22 a cross-sectional study. *BMC Womens Health*. 2015;15:68.  
23
- 24 14. Rwakarema M. *Prevalence of antenatal depression and associated psychosocial risk*  
25 *factors among pregnant women in Mwanza, Northern Tanzania* [MPH thesis,  
26 Unpublished]. Catholic University of Health and Allied Sciences, 2013.  
27
- 28 15. Madhavanprabhakaran GK, D'Souza MS, Nairy KS. Prevalence of pregnancy anxiety  
29 and associated factors. *International Journal of Africa Nursing Sciences* 2015;3:1-7. doi:  
30 10.1016/j.ijans.2015.06.002.  
31
- 32 16. Gurung RAR, Dunkel-Schetter C, Collins N, *et al.* Psychosocial predictors of prenatal  
33 anxiety. *J Soc Clin Psychol* 2005;24:497-519.  
34  
35  
36  
37  
38  
39  
40  
41  
42  
43  
44  
45  
46  
47  
48  
49  
50  
51  
52  
53  
54  
55  
56  
57  
58  
59  
60

17. Lee AM, Lam SK, Sze Mun Lau SM, *et al.* Prevalence, course, and risk factors for antenatal anxiety and depression. *Obstet Gynecol* 2007;110(5):1102-12.
18. United States of America Central Intelligence Agency. The World Factbook: Africa Tanzania. The Center of Intelligence Agency; 2016. Available from <https://www.cia.gov/library/publications/the-world-factbook/geos/tz.html> [accessed 5 October 2017]
19. Fisher J, Cabral de Mello M, Patel V, *et al.* Prevalence and determinants of common perinatal mental disorders in women in low- and lower-middle-income countries: a systematic review. *Bull World Health Organ* 2012;90(2):139G-49H. doi: 10.2471/BLT.11.091850.
20. Lazarus RS, Folkman S. Stress, appraisal, and coping. New York, NY: Springer; 1984.
21. King Rosario, Premji SS, Nyanza EC, *et al.* A qualitative study of pregnancy-related anxiety among women in Tanzania. *BMJ Open* 2017;7:e016072. doi: 10.1136/bmjopen-2017-016072
22. Stokols D. Establishing and maintaining healthy environments: toward a social ecology of health promotion. *Am Psychol* 1992;47(1):6-22. doi: 10.1037/0003-066X.47.1.6.
23. Premji S. Seed grant application for psychosocial health of women in Mwanza City: Biomarkers of stress, anxiety, depression, and birth outcomes. [Unpublished Grant Application; 2013].
24. Rini CK, Dunkel-Schetter C, Wadhwa PD, *et al.* Psychological adaptation and birth outcomes: the roles of personal resources, stress, and sociocultural context in pregnancy. *Health Psychol* 1999;18(4):333-45.



- 1  
2  
3 25. Wadhwa PD, Sandman CA, Porto M, *et al.* The association between prenatal stress and  
4 infant birth weight and gestational age at birth: a prospective investigation. *Am J Obstet*  
5  
6 *Gynecol* 1993;169(4):858-65. doi: 10.1016/0002-9378(93)90016-C  
7  
8  
9
- 10 26. Rutstein S, Johnson K. The DHS wealth index. DHS Comparative Reports No 6.  
11  
12 Calverton, MD: ORC Macro 2004.  
13
- 14 27. Hardan-Khalil K, Mayo AM. Psychometric properties of the multidimensional scale of  
15 perceived social support. *Clinical Nurse Specialist* 2015;29(5):258-61. doi:  
16  
17 10.1097/NUR.0000000000000148. PubMed PMID: 26258831.  
18  
19  
20
- 21 28. Cohen SC, Kamarck T, Mermelstein R. A global measure of perceived stress. *J Health*  
22  
23 *Soc Behav* 1983;24(4):385-96.  
24  
25
- 26 29. Lee E-H. Review of the psychometric evidence of the perceived stress scale. *Asian Nurs*  
27  
28 *Res* 2012;6(4):121-7. doi: 10.1016/j.anr.2012.08.004.  
29  
30
- 31 30. Bunevicius R, Bunevicius A, Kusminskas L. P02-206 Validity of the Edinburgh postnatal  
32  
33 depression scale. *Eur Psychiat* 2009;24:S896-S. doi: 10.1016/S0924-9338(09)71129-0.  
34  
35
- 36 31. Cox J, Holden J, Sagovsky R. Detection of postnatal depression: development of the 10-  
37  
38 item Edinburgh Postnatal Depression Scale. *Br J Psychiatry* 1987;150:782-6.  
39
- 40 32. Navarro P, Ascaso BS, Garcia-Esteve L, *et al.* Postnatal psychiatric morbidity: a  
41  
42 validation study of the GHQ-12 and the EPDS as screening tools. *Gen Hosp Psychiatry*.  
43  
44 2007;29(1):1-7. doi: 10.1016/j.genhosppsy.2006.10.004.  
45  
46
- 47 33. Hosmer DW, Lemeshow S, Sturdivant RX. Applied logistic regression (3<sup>rd</sup> ed.).  
48  
49 Hoboken, New Jersey: Wiley 2013.  
50
- 51 34. Fairlie TG, Gillman MW, Rich-Edwards J. High pregnancy-related anxiety and prenatal  
52  
53 depressive symptoms as predictors of intention to breastfeed and breastfeeding initiation.  
54  
55  
56  
57  
58  
59

- 1  
2  
3  
4  
5  
6  
7  
8  
9  
10  
11  
12  
13  
14  
15  
16  
17  
18  
19  
20  
21  
22  
23  
24  
25  
26  
27  
28  
29  
30  
31  
32  
33  
34  
35  
36  
37  
38  
39  
40  
41  
42  
43  
44  
45  
46  
47  
48  
49  
50  
51  
52  
53  
54  
55  
56  
57  
58  
59  
60
- J Womens Health* 2009;18(7):945-53. doi: 10.1089/jwh.2008.0998. PubMed PMID: 43147667.
35. Brouwers EPM, van Baar AL, Pop VJM. Does the Edinburgh Postnatal Depression Scale measure anxiety? *J Psychosom Res* 2001;51(5):659-63. doi: 10.1016/S0022-3999(01)00245-8.
36. Field, Diego M, Hernandez-Reif M, *et al.* Comorbid depression and anxiety effects on pregnancy and neonatal outcome. *Infant Behav Dev* 2010;33(1):23-9. doi: 10.1016/j.infbeh.2009.10.004.
37. King Rosario. Pregnancy-related anxiety in Mwanza, Tanzania: a qualitative approach [Masters thesis]. Univeristy of Calgary, 2016.
38. Bayrampour H, Ali E, McNeil DA, *et al.* Pregnancy-related anxiety: a concept analysis. *Int J Nurs Stud* 2016;55:115-30. doi: 10.1016/j.ijnurstu.2015.10.023.
39. Evans K, Spiby H, Morrell CJ. A psychometric systematic review of self-report instruments to identify anxiety in pregnancy. *J Adv Nurs* 2015;71(9):1986-2001. doi: 10.1111/jan.12649.

**LEGEND****Tables**

- Table 1. Variable selected for bivariate analysis
- Table 2. Demographic characteristics
- Table 3. Regression model of factors associated with PRA score

**Figures**

- Figure 1. Recruitment flow diagram

1  
2  
3  
4  
5  
6  
7  
8  
9  
10  
11  
12  
13  
14  
15  
16  
17  
18  
19  
20  
21  
22  
23  
24  
25  
26  
27  
28  
29  
30  
31  
32  
33  
34  
35  
36  
37  
38  
39  
40  
41  
42  
43  
44  
45  
46  
47  
48  
49  
50  
51  
52  
53  
54  
55  
56  
57  
58  
59  
60

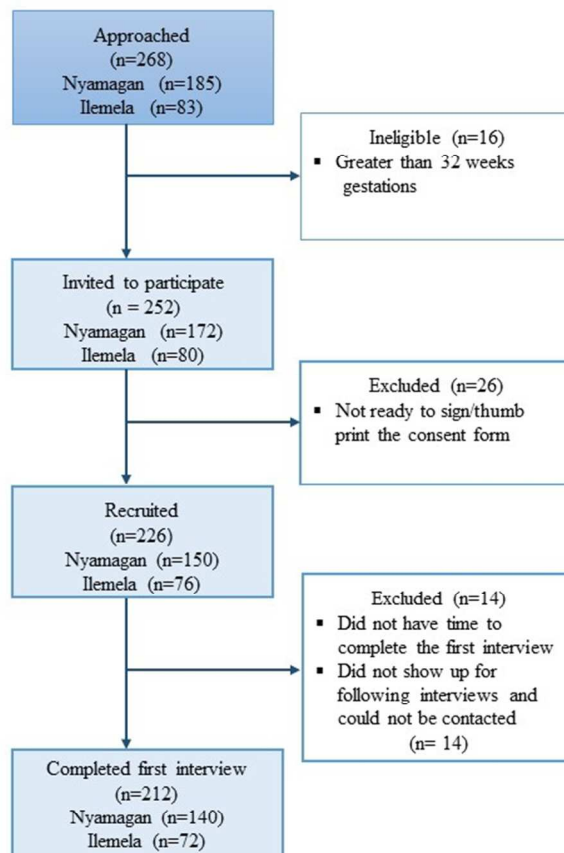

Figure 1. Recruitment flow diagram

190x254mm (96 x 96 DPI)

**STROBE 2007 (v4) checklist of items to be included in reports of observational studies in epidemiology\***  
**Checklist for cohort, case-control, and cross-sectional studies (combined)**

| Section/Topic             | Item # | Recommendation                                                                                                                                                                                                                                                                                                                                                                                                                                                         | Reported on page # |
|---------------------------|--------|------------------------------------------------------------------------------------------------------------------------------------------------------------------------------------------------------------------------------------------------------------------------------------------------------------------------------------------------------------------------------------------------------------------------------------------------------------------------|--------------------|
| Title and abstract        | 1      | (a) Indicate the study’s design with a commonly used term in the title or the abstract                                                                                                                                                                                                                                                                                                                                                                                 | 1-2                |
|                           |        | (b) Provide in the abstract an informative and balanced summary of what was done and what was found                                                                                                                                                                                                                                                                                                                                                                    | 2                  |
| <b>Introduction</b>       |        |                                                                                                                                                                                                                                                                                                                                                                                                                                                                        |                    |
| Background/rationale      | 2      | Explain the scientific background and rationale for the investigation being reported                                                                                                                                                                                                                                                                                                                                                                                   | 4-6                |
| Objectives                | 3      | State specific objectives, including any pre-specified hypotheses                                                                                                                                                                                                                                                                                                                                                                                                      | 6                  |
| <b>Methods</b>            |        |                                                                                                                                                                                                                                                                                                                                                                                                                                                                        |                    |
| Study design              | 4      | Present key elements of study design early in the paper                                                                                                                                                                                                                                                                                                                                                                                                                | 6-7                |
| Setting                   | 5      | Describe the setting, locations, and relevant dates, including periods of recruitment, exposure, follow-up, and data collection                                                                                                                                                                                                                                                                                                                                        | 7-8                |
| Participants              | 6      | (a) <i>Cohort study</i> —Give the eligibility criteria, and the sources and methods of selection of participants. Describe methods of follow-up<br><i>Case-control study</i> —Give the eligibility criteria, and the sources and methods of case ascertainment and control selection. Give the rationale for the choice of cases and controls<br><i>Cross-sectional study</i> —Give the eligibility criteria, and the sources and methods of selection of participants | 7-8                |
|                           |        | (b) <i>Cohort study</i> —For matched studies, give matching criteria and number of exposed and unexposed<br><i>Case-control study</i> —For matched studies, give matching criteria and the number of controls per case                                                                                                                                                                                                                                                 | N/A                |
| Variables                 | 7      | Clearly define all outcomes, exposures, predictors, potential confounders, and effect modifiers. Give diagnostic criteria, if applicable                                                                                                                                                                                                                                                                                                                               | 8-10               |
| Data sources/ measurement | 8*     | For each variable of interest, give sources of data and details of methods of assessment (measurement). Describe comparability of assessment methods if there is more than one group                                                                                                                                                                                                                                                                                   | 8-9                |
| Bias                      | 9      | Describe any efforts to address potential sources of bias ( <b><i>systematic sampling to reduce selection bias</i></b> )                                                                                                                                                                                                                                                                                                                                               | 7                  |
| Study size                | 10     | Explain how the study size was arrived at ( <b><i>convenience sample</i></b> )                                                                                                                                                                                                                                                                                                                                                                                         | 7                  |
| Quantitative variables    | 11     | Explain how quantitative variables were handled in the analyses. If applicable, describe which groupings were chosen and why                                                                                                                                                                                                                                                                                                                                           | 9-10               |
| Statistical methods       | 12     | (a) Describe all statistical methods, including those used to control for confounding                                                                                                                                                                                                                                                                                                                                                                                  | 9-11               |
|                           |        | (b) Describe any methods used to examine subgroups and interactions                                                                                                                                                                                                                                                                                                                                                                                                    | 11                 |
|                           |        | (c) Explain how missing data were addressed                                                                                                                                                                                                                                                                                                                                                                                                                            | N/A                |
|                           |        | (d) <i>Cohort study</i> —If applicable, explain how loss to follow-up was addressed<br><i>Case-control study</i> —If applicable, explain how matching of cases and controls was addressed                                                                                                                                                                                                                                                                              | N/A                |

|                          |     |                                                                                                                                                                                                              |       |
|--------------------------|-----|--------------------------------------------------------------------------------------------------------------------------------------------------------------------------------------------------------------|-------|
|                          |     | <i>Cross-sectional study</i> —If applicable, describe analytical methods taking account of sampling strategy                                                                                                 |       |
|                          |     | (e) Describe any sensitivity analyses ( <b>supplemental analyses conducted</b> )                                                                                                                             | 11    |
| <b>Results</b>           |     |                                                                                                                                                                                                              |       |
| Participants             | 13* | (a) Report numbers of individuals at each stage of study—eg numbers potentially eligible, examined for eligibility, confirmed eligible, included in the study, completing follow-up, and analysed            | 12    |
|                          |     | (b) Give reasons for non-participation at each stage                                                                                                                                                         | N/A   |
|                          |     | (c) Consider use of a flow diagram                                                                                                                                                                           | N/A   |
| Descriptive data         | 14* | (a) Give characteristics of study participants (eg demographic, clinical, social) and information on exposures and potential confounders                                                                     | 12    |
|                          |     | (b) Indicate number of participants with missing data for each variable of interest                                                                                                                          | N/A   |
|                          |     | (c) <i>Cohort study</i> —Summarise follow-up time (eg, average and total amount)                                                                                                                             | N/A   |
| Outcome data             | 15* | <i>Cohort study</i> —Report numbers of outcome events or summary measures over time                                                                                                                          | N/A   |
|                          |     | <i>Case-control study</i> —Report numbers in each exposure category, or summary measures of exposure                                                                                                         | N/A   |
|                          |     | <i>Cross-sectional study</i> —Report numbers of outcome events or summary measures                                                                                                                           | 12-13 |
| Main results             | 16  | (a) Give unadjusted estimates and, if applicable, confounder-adjusted estimates and their precision (eg, 95% confidence interval). Make clear which confounders were adjusted for and why they were included | 12-14 |
|                          |     | (b) Report category boundaries when continuous variables were categorized                                                                                                                                    | 12-13 |
|                          |     | (c) If relevant, consider translating estimates of relative risk into absolute risk for a meaningful time period                                                                                             | N/A   |
| Other analyses           | 17  | Report other analyses done—eg analyses of subgroups and interactions, and sensitivity analyses                                                                                                               | 14    |
| <b>Discussion</b>        |     |                                                                                                                                                                                                              |       |
| Key results              | 18  | Summarise key results with reference to study objectives                                                                                                                                                     | 14-17 |
| Limitations              | 19  | Discuss limitations of the study, taking into account sources of potential bias or imprecision. Discuss both direction and magnitude of any potential bias                                                   | 17    |
| Interpretation           | 20  | Give a cautious overall interpretation of results considering objectives, limitations, multiplicity of analyses, results from similar studies, and other relevant evidence                                   | 18    |
| Generalisability         | 21  | Discuss the generalisability (external validity) of the study results                                                                                                                                        | 17    |
| <b>Other information</b> |     |                                                                                                                                                                                                              |       |
| Funding                  | 22  | Give the source of funding and the role of the funders for the present study and, if applicable, for the original study on which the present article is based                                                | 18    |

\*Give information separately for cases and controls in case-control studies and, if applicable, for exposed and unexposed groups in cohort and cross-sectional studies.

**Note:** An Explanation and Elaboration article discusses each checklist item and gives methodological background and published examples of transparent reporting. The STROBE checklist is best used in conjunction with this article (freely available on the Web sites of PLoS Medicine at <http://www.plosmedicine.org/>, Annals of Internal Medicine at <http://www.annals.org/>, and Epidemiology at <http://www.epidem.com/>). Information on the STROBE Initiative is available at [www.strobe-statement.org](http://www.strobe-statement.org).

# BMJ Open

## Factors associated with pregnancy-related anxiety in Tanzanian Women: a cross sectional study

|                                 |                                                                                                                                                                                                                                                                                                                                                                                                                                                                                                                                                                                                                           |
|---------------------------------|---------------------------------------------------------------------------------------------------------------------------------------------------------------------------------------------------------------------------------------------------------------------------------------------------------------------------------------------------------------------------------------------------------------------------------------------------------------------------------------------------------------------------------------------------------------------------------------------------------------------------|
| Journal:                        | <i>BMJ Open</i>                                                                                                                                                                                                                                                                                                                                                                                                                                                                                                                                                                                                           |
| Manuscript ID                   | bmjopen-2017-020056.R1                                                                                                                                                                                                                                                                                                                                                                                                                                                                                                                                                                                                    |
| Article Type:                   | Research                                                                                                                                                                                                                                                                                                                                                                                                                                                                                                                                                                                                                  |
| Date Submitted by the Author:   | 13-Mar-2018                                                                                                                                                                                                                                                                                                                                                                                                                                                                                                                                                                                                               |
| Complete List of Authors:       | Wall, Vanessa; University of Calgary, Faculty of Nursing<br>Premji, Shahirose; University of Calgary, Faculty of Nursing; University of Calgary Cumming School of Medicine, Community Health Sciences<br>Letourneau, Nicole; University of Calgary, Faculty of Nursing; University of Calgary Cumming School of Medicine, Pediatrics, Psychiatry and Community Health Sciences<br>McCaffrey, Graham; University of Calgary, Faculty of Nursing<br>Nyanza, Elias; Catholic University of Health and Allied Sciences, School of Public Health; University of Calgary, Community Health Sciences, Cumming School of Medicine |
| <b>Primary Subject Heading</b>: | Global health                                                                                                                                                                                                                                                                                                                                                                                                                                                                                                                                                                                                             |
| Secondary Subject Heading:      | Public health, Mental health                                                                                                                                                                                                                                                                                                                                                                                                                                                                                                                                                                                              |
| Keywords:                       | PRIMARY CARE, PUBLIC HEALTH, PERINATOLOGY                                                                                                                                                                                                                                                                                                                                                                                                                                                                                                                                                                                 |
|                                 |                                                                                                                                                                                                                                                                                                                                                                                                                                                                                                                                                                                                                           |

SCHOLARONE™  
Manuscripts

only

Running head: PREGNANCY RELATED ANXIETY IN TANZANIA

1

**Title:** Factors Associated with Pregnancy-Related Anxiety in Tanzanian Women: a cross sectional study

**Authors:** Vanessa Wall<sup>1,\*</sup>, Shahirose Sadrudin Premji<sup>1,2,\*,\$</sup>, Nicole Letourneau<sup>1,2,3</sup>, Graham McCaffrey<sup>1</sup>, Elias Charles Nyanza<sup>2,4</sup>

<sup>1</sup> Faculty of Nursing, University of Calgary, Calgary, AB, CANADA

<sup>2</sup> Community Health Sciences, Cumming School of Medicine, University of Calgary, Calgary, AB, CANADA

<sup>3</sup> Pediatrics and Psychiatry, Cumming School of Medicine, University of Calgary, AB, CANADA

<sup>4</sup> School of Public Health, Catholic University of Health and Allied Sciences, Bugando Area, Mwanza, Tanzania

\* Equal contribution

§ Corresponding author

**Correspondence to:**

Dr. Shahirose Premji  
Faculty of Nursing, University of Calgary  
2500 University Drive NW  
Calgary, Alberta, CANADA T2N 1N4  
Email: [premjis@ucalgary.ca](mailto:premjis@ucalgary.ca)  
Tel: 403.220.4081

**Keywords:** Pregnancy-related anxiety; anxiety; women's health; pregnancy; global health

**Word count:** 4,466



## PREGNANCY RELATED ANXIETY IN TANZANIA

2

**ABSTRACT**

**Objective:** To identify factors predictive of pregnancy-related anxiety (PRA) among women in Mwanza, Tanzania.

**Design:** A cross sectional study was used to explore the relationship between psychosocial health and preterm birth.

**Setting:** Antenatal clinics in the Ilemela and Nyamagana districts of Mwanza, Tanzania.

**Participants:** Pregnant women less than or equal to 32 weeks' gestational age (N=212) attending the two antenatal clinics.

**Measures:** PRA was measured using a revised version of the 10-item PRA Questionnaire (PRA-Q). Predictive factors included social support (Multidimensional Scale of Perceived Social Support), stress (Perceived Stress Scale), depression (Edinburg Postpartum Depression Scale), and socio-demographic data. Bivariate analysis permitted variable selection while multiple linear regression analysis enabled identification of predictive factors of PRA.

**Results:** Twenty-five percent of women in our sample scored 13 or higher (out of a possible 30) on the PRA-Q. Perceived stress, active depression, and number of people living in the home were the only statistically significant predictors of PRA in our sample.

**Conclusions:** Our findings were contrary to most current literature which notes socio-economic status and social support as significant factors in PRA. A greater understanding of the experience of PRA within the social cultural context of low- and middle-income countries and its predictive factors is needed in low- and middle-income countries to support the development of PRA prevention strategies.

## ARTICLE SUMMARY

### Strengths and limitations of this study

- This is the first study to examine predictive factors for PRA among pregnant women in Tanzania and identifies the importance of cultural context when examining PRA among pregnant women in LMIC.
- This study used secondary data limiting variable options to those already included in the primary longitudinal study.
- There is no established normative reference to indicate when a woman is at “high risk” for PRA. Thus factors identified in this study should only be considered in relation to relative (i.e., higher or lower) PRA scores.
- Convenience sampling was employed and consequently results cannot be generalized to all pregnant women in the Ilemela and Nyamagana districts of Tanzania.
- The sample size of the current study may have limited the power of some of the statistical analysis making it difficult to make inferences.

## INTRODUCTION

Pregnancy-related anxiety (PRA) is characterized by anxiety pertaining to the pregnancy, including labour and delivery, the fetus or infant's health, the mother's health, accessibility and quality of health care resources, and/or the ability to parent.[1-4] PRA is a distinct and different phenomenon than general anxiety occurring concurrent to pregnancy [1] and has stronger correlations to preterm birth (PTB) (birth at less than 37 weeks' gestation) than more commonly studied general anxiety or depression.[2, 4-6] An estimated 85% of PTB globally, occur in Africa and Asia.[7] Africa has the highest rate of PTB where some regions reach 17.5%.[7] approximately 14.3% of births are preterm in Eastern Africa.

PRA prevalence estimates in high-income countries range from 6 - 29%.[8-11] however, high-risk populations tend to yield higher rates of PRA.[9] Among a sample of pregnant women from Tanzania (a low-income country [12]), in the city of Mwanza, the rate of PRA was 18.3%, which was associated with antenatal depression (odds ratio 1.36, 95% confidence interval 1.23 to 1.5).[13, Rwakarema 2013 unpublished] In the lower-middle income country of India,[12] in the city of Kerala, prevalence of severe PRA ranged from 0.4% to 22% depending on the trimester, but at least 74% of Indian women experienced "moderate levels" of PRA in all trimesters which was not operationally defined.[14] Prevalence of PRA varies in part due to methodological heterogeneity (e.g., characteristics of sample, timing of measurement), and clinical heterogeneity (e.g., measuring anxiety during pregnancy rather than PRA[14]).

Within high-income countries, non-Caucasian ethnicity, low family income, and limited social supports are consistently noted as prominent risk factors for PRA.[2, 15, 16] In low-and-middle-

## PREGNANCY RELATED ANXIETY IN TANZANIA

5

1  
2  
3 income countries (LMIC), it is unknown if these remain the most prominent risk factors for  
4  
5 PRA. In Tanzania, 67% of the population falls below the poverty line and 99% of Tanzanians are  
6  
7 of African ethnicity.[17] Moreover, 69% of the population lives in rural areas and there are only  
8  
9 three physicians per 100000 people [17] which may result in concerns related to healthcare  
10  
11 resources which further contributes to the potential for PRA. As such, it seems reasonable to  
12  
13 anticipate PRA prevalence in low- and middle-income countries such as Tanzania may be  
14  
15 comparable to PRA rates in high-risk populations within high-income countries.  
16  
17  
18  
19  
20

21 Unfortunately, there is a dearth of literature examining PRA in LMIC; only 8% of LMIC are  
22  
23 represented in literature regarding all common mental illness during the prenatal period.[18]  
24  
25 This lack of contextually relevant literature makes it difficult to develop practice guidelines or  
26  
27 protocols to address PRA in these countries. Moreover, in many LMIC like Tanzania, many  
28  
29 women come from similar socioeconomic backgrounds and it remains unclear why some women  
30  
31 develop severe PRA and others do not. Alternative theories of stress can offer insight about  
32  
33 stressful events, such as PRA, in unexamined populations. Lazarus and Folkman [19] suggest  
34  
35 that stress occurs when people are faced with a situation they deem a possible threat and cannot  
36  
37 access the resources required to manage the threat. In accordance with this theory, the  
38  
39 differences in sociocultural context between high-income countries and LMIC may be that LMIC  
40  
41 hold different risk factors for PRA than high-income countries. Differences in countries' public  
42  
43 health education may alter the amount of anxiety women have about the physical symptoms of  
44  
45 pregnancy as they are more or less aware of what to expect and what is normal.[20] Moreover,  
46  
47 difference in accessibility to health care services can affect women's appraisal of whether or not  
48  
49 adequate prenatal care is attainable. This doubt can increase concerns about pregnancy  
50  
51  
52  
53  
54  
55  
56  
57  
58  
59  
60

## PREGNANCY RELATED ANXIETY IN TANZANIA

6

1  
2  
3 complications, delivery, or infant care, particularly if access to healthcare is limited or women  
4  
5 have had previous negative healthcare experiences.[2] Consequently, factors associated with  
6  
7 PRA in high-income countries should not be assumed true for LMIC.  
8  
9

10  
11  
12 We used the Social Ecology Model for Health Promotion [21] to identify predictive factors. The  
13  
14 Model proposes health promotion is most effective when we consider the interaction of peoples'  
15  
16 attributes and both their physical environment and social climate.[21] As people change their  
17  
18 environment it will contribute to their change in health. In this model, the notion of  
19  
20 “environment” is multidimensional and can include tangible attributes (i.e. upsetting events in  
21  
22 the community) or social constructs, objective qualities or perceived qualities, and/or social  
23  
24 climate or physical surroundings.[21] Additionally, the Social Ecology Model for Health  
25  
26 Promotion asserts that human-environment interactions should be considered on both small and  
27  
28 large scales (e.g. individuals, families, communities, and populations).[21] Therefore, in order to  
29  
30 thoroughly examine factors associated with PRA in women in the low-income country of  
31  
32 Tanzania, we examine attributes of pregnant women, their families, their communities and their  
33  
34 environment. We sought to answer the research question: what predictive factors are associated  
35  
36 with PRA for women attending antenatal clinics in the Ilemela and Nyamagana districts of  
37  
38 Tanzania, Africa.  
39  
40  
41  
42  
43  
44  
45  
46

## 47 **METHODS**

### 48 **Study design**

49  
50 We used data collected during women's first attendance at prenatal clinic (gestational age 6-32  
51  
52 weeks). These women were enrolled in a prospective longitudinal study that explored the  
53  
54  
55  
56  
57  
58  
59  
60

## PREGNANCY RELATED ANXIETY IN TANZANIA

7

1  
2  
3 relationship between psychosocial health and preterm birth among women in Mwanza,  
4  
5 Tanzania.[Premji 2013 unpublished] A collaborative research team comprised of faculty and  
6  
7 graduate students, from University of Calgary and Catholic University of Health and Allied  
8  
9 Sciences (CUHAS) in Mwanza, Tanzania and local registered nurses who also served as field  
10  
11 workers, collected data at four time points throughout participants' pregnancies (first trimester,  
12  
13 early second trimester, late second trimester, and early third trimester). During the first time  
14  
15 point, women were coached to return to the clinic every six weeks until 32 weeks gestation, then  
16  
17 were seen at delivery and again 6 weeks postpartum.[Premji 2013 unpublished] At each point of  
18  
19 contact participants received a perinatal mental health assessment; private space was provided to  
20  
21 complete questionnaires.[Premji 2013 unpublished] The Conjoint Health Research Ethics Board  
22  
23 at the University of Calgary (approval numbers REB 13-0399 and 16-1579), and the Catholic  
24  
25 University of Health and Allied Sciences/Bugando Medical Centre Research Ethical Committee  
26  
27 (CREC/062/2013) approved these studies (i.e., primary and secondary analysis). The larger study  
28  
29 was also approved by the Tanzania National Institute of Medical Research - Lake Zone  
30  
31 Institutional Review Board (MR/53/100/254 and MR/53/100/160).  
32  
33  
34  
35  
36  
37  
38  
39

**Patient involvement**

40  
41 Patients and/or public were not involved in the design of the study.  
42  
43  
44  
45  
46

**Setting and participants**

47  
48 A convenience sample of 212 women was recruited, using a systematic sampling approach, from  
49  
50 antenatal clinics in the Ilemela (n=72) and Nyamagana (n=140) districts of Tanzania from June  
51  
52 2013-January 2015.[Premji 2013 unpublished] The sample was comprised of women who spoke  
53  
54  
55  
56  
57  
58  
59  
60

## PREGNANCY RELATED ANXIETY IN TANZANIA

8

1  
2  
3 Swahili or English, and were 32 weeks' gestational age or less at the time of enrollment based on  
4  
5 women's last menstrual period. Adolescent mothers were included as they were classified as  
6  
7 emancipated minors.[Premji 2013 unpublished] Women who self-reported co-morbidities such  
8  
9 as hypertension, diabetes, malaria or human-immunodeficiency virus (HIV) were not excluded  
10  
11 due to the prevalence of these illnesses. Recent work within this sample revealed that the high  
12  
13 prevalence of HIV coupled with minimal health knowledge has resulted in women with and  
14  
15 without HIV sharing similar concerns about the illness and potential effects on their baby.[20]  
16  
17 The nurse in-charge was the first to approach and invite participation from eligible women in the  
18  
19 waiting room of the antenatal clinics. A member of the research team then obtained informed  
20  
21 consent from women who agreed to participate (see image file for Figure 1 Recruitment flow  
22  
23 diagram).[Premji 2013 unpublished]  
24  
25  
26  
27  
28  
29  
30

**Data collection**

31  
32  
33 A general questionnaire was used to collect socio-demographic data including age, education,  
34  
35 income, and co-morbidities.[Premji 2013 unpublished] PRA was measured using a revised  
36  
37 version of the 10-item PRA Questionnaire (PRA-Q) that assesses feelings about health during  
38  
39 pregnancy, infant or baby's health, and labour and delivery.[22, 23] Each item was a 4-point  
40  
41 Likert scale of 0-3; a cumulative score was given out of a possible 30 points.[22] Information on  
42  
43 household incomes was difficult to obtain due to cultural norms and traditions.[13]  
44  
45  
46 Consequently, socio-economic welfare was assessed using a Likert scale questionnaire focused  
47  
48 on the acquisition of assets (e.g. car, motorcycle, bicycle), living standards (e.g., access to water,  
49  
50 and number of meals eaten per day), and other wealth status (e.g., employment).[13, 24] Most  
51  
52 questions were dichotomous (yes or no) with an associated score of one or two with the  
53  
54  
55  
56  
57  
58  
59  
60

1  
2  
3 exception of three questions; roof type and meals per day provided three possible answers with  
4 associated scores of one to three and water source had five possible answers with scores from  
5 one to five. The final score on the Socio-Economic Welfare Questionnaire (SEW-Q) was a sum  
6 of all the answers for a maximum possible score of 29. Social support was rated using the 12-  
7 item Multidimensional Scale of Perceived Social Support.[25] This scale includes questions  
8 about the relationship of supportive people to the participant, the perceived level of support the  
9 participant receives from her support network, and the extent to which the participant feels cared  
10 for by the people closest to her.[25] This scale has high internal consistency reliability  
11 (Cronbach's  $\alpha > 0.90$ ). Perceived stress (PS) was measured with a 10-item tool (4-point Likert  
12 scale) examining the frequency of increased stress, perceived level of control over their life and  
13 stressful events, and ability to cope with stress. A cumulate score was given out of a possible 40  
14 with higher scores indicating increased stress.[26] Evaluation of the PS scale has consistently  
15 shown adequate reliability (Cronbach's  $\alpha > 0.70$ ) and has been used with a variety of populations  
16 and translated into 25 languages.[27] However, empirical evaluation has not been completed on  
17 these translated versions or with populations other than college students or the employed.[27]  
18 The Edinburgh Postnatal Depression Scale (EPDS), a self-reported 10-item scale was used to  
19 screen for depression and identify at-risk mothers. Empirical evaluation demonstrates good  
20 reliability (Cronbach's  $\alpha=0.83$ ) [28]. This scale has been extensively tested in both pregnant and  
21 postnatal populations and is widely accepted for global populations with translations in several  
22 languages.[29, 30] The EPDS has been used and tested in various African countries and  
23 translated into many languages including Swahili.[31, 32]

### Statistical analysis



## PREGNANCY RELATED ANXIETY IN TANZANIA

10

For bivariate analysis, variables of interests (Table 1) were selected based on factors identified in the current literature, the theory of cognitive appraisal,[19] and the social ecological model for health promotion.[21] Bivariate analyses identified which continuous variables had a relationship with the PRA total score. Nominal variables with more than two values (i.e. marital status, occupation) were converted into dichotomous variables (i.e. in relationship or not) and analyzed with Mann-Whitney U tests as PRA was not normally distributed. Converted variables found to have a significant association with PRA total score were then expanded and each variable's

**Table 1. Variable selected for bivariate analysis**

| Individual                       | Family                                | Community                                |
|----------------------------------|---------------------------------------|------------------------------------------|
| EPDS Score *                     | Sum of SEW-Q Score *                  | Events in the Community Upsetting to You |
| Age of participant               | Gravidity                             | Perceived Social Support Score           |
| Mother Born in Mwanza            | Current Marital Status **             | Healthcare Facility                      |
| Mother's highest level education | Mother's Main Occupation              |                                          |
| PS Score *                       | Father's Main Occupation              |                                          |
| History of Hypertension          | Father's Highest Level of Education * |                                          |
| History of Depression *          | Total Number of Pregnancies           |                                          |
| History of Gestational Diabetes  | Total Number of Live Births           |                                          |
| History of Schistosomiasis       | Previously Had Preterm *              |                                          |
| History of Syphilis              | Previously Had a Male Baby            |                                          |
| History of HIV *                 | Number of People Living in the Home * |                                          |
| History of Malaria               | Planned Pregnancy *                   |                                          |
| History of Anemia                | Gestational Age at First Visit        |                                          |

EPDS, Edinburgh Postnatal Depression Scale; PS, perceived stress; HIV, human-immunodeficiency virus; SEW-Q, Socio-Economic Welfare Questionnaire.

\*Predictor variable in regression analysis

\*\*Married and Separated were dichotomized predictor variables in regression analysis

original values (i.e. coupled, married, common-law, divorced, etc.) were analyzed as separate dichotomous variables using Mann-Whitney U test for an association with PRA total score.

## PREGNANCY RELATED ANXIETY IN TANZANIA

11

Ordinal variables (i.e. education) were analyzed with Kruskal-Wallis tests as PRA was not normally distributed. Variables with a significance level of  $p \leq 0.25$  in the bivariate analyses were included in the multiple linear regression analyses.[33] Variables known to have clinical relevance such as socio-economic welfare score and marital status were also included regardless of their statistical significance.

Multiple linear regression modeling was employed with PRA total score as the dependent variable. In order to assess variables associated with the most severe cases of PRA, PRA scores were divided into quartiles and only cases with PRA scores in the top and bottom quartiles were analyzed in this multiple regression analyses. Given the rigorous variable selection process, a backwards input method was used. Variables were then removed starting with the variables that were least statistical significant. A two-sided  $p$  value of  $\leq 0.05$  was considered statistically significant for all multiple linear regression analyses. Residual of error values were then examined in a scatter plot, Q-Q plot, and histogram to verify the assumptions of normal distribution and homoscedasticity were satisfied.

We conducted supplemental analyses to provide a comparison with the primary analyses which only used cases with PRA scores in the first and fourth quartile. The first supplemental analysis employed the same multiple linear regression process as the primary analysis but included all PRA scores. We employed the same variable selection method described in the primary analysis. Currently there is no empirically tested, or commonly accepted, method for operationalizing PRA-Q scores into levels of severity. Thus, our primary analysis maintained rigor by leaving these scores as a continuous variable. To evaluate how our results may compare to studies that

## PREGNANCY RELATED ANXIETY IN TANZANIA

12

1  
2  
3 have categorized PRA scores, we completed a second supplemental analysis. Using all 212  
4  
5 cases, PRA scores were dichotomized in accordance with the work of Fairlie et al.;[34] high-  
6  
7 anxiety was defined as three or more answers of “3” (very much) on the PRA-Q. All other scores  
8  
9 were categorized as low-moderate anxiety. Bivariate and  $\chi^2$  tests were conducted where  
10  
11 appropriate, to identify factors associated with high, or low-moderate PRA.  
12  
13  
14  
15

**RESULTS**

16  
17  
18  
19 The sample was comprised of 72 women from the Ilemela district and 140 women from the  
20  
21 health center in Nyamagana ( $N=212$ ) with a median age of 26 years (range 16 – 44 years).  
22  
23 Approximately three-quarters of participants (78.2%) were multiparous, the majority of  
24  
25 participants were in a relationship (89.6%), and over three-quarters of participants (77.8%)  
26  
27 identified that they were married. Although nearly all participants (97.2%) had some level of  
28  
29 formal education, most had only completed primary school (64.6%). Socio-economic status was  
30  
31 higher than expected with 57.1% of participants scoring 12 or better (out of 18) on the SEW-Q  
32  
33 and 9.0% scoring five or less. PRA-Q scores ranged from 0-24 with a median score of 10 (inter  
34  
35 quartile range (IQR)=8-13). When PRA was dichotomized as “high” and “low-moderate”  
36  
37 categories, 6.1% of participants ( $n=13$ ) had high anxiety. Table 2 shows the demographic  
38  
39 characteristics and PRA scores of the study’s sample.  
40  
41  
42  
43  
44  
45  
46

**Table 2. Demographic characteristics**

|                                     | Total<br>N=212 | Nyamagana<br>n=140 (66%) | Ilemela<br>n=72 (34%) |
|-------------------------------------|----------------|--------------------------|-----------------------|
|                                     | Median (range) | Median (range)           | Median (range)        |
| Age (years)                         | 26 (16-44)     | 33 (16-44)               | 29 (17-40)            |
| GA (weeks) at 1 <sup>st</sup> visit | 24 (6-32)      | 23 (6-32)                | 26 (8-32)             |
|                                     | N (%)          | n (%)                    | n (%)                 |

## PREGNANCY RELATED ANXIETY IN TANZANIA

13

1  
2  
3  
4  
5  
6  
7  
8  
9  
10  
11  
12  
13  
14  
15  
16  
17  
18  
19  
20  
21  
22  
23  
24  
25  
26  
27  
28  
29  
30  
31  
32  
33  
34  
35  
36  
37  
38  
39  
40  
41  
42  
43  
44  
45  
46  
47  
48  
49  
50  
51  
52  
53  
54  
55  
56  
57  
58  
59  
60

|                                |                |                |                |
|--------------------------------|----------------|----------------|----------------|
| Primiparous                    | 50 (21.8)      | 33 (21.6)      | 17 (22.7)      |
| Born in Mwanza                 | 71 (33.5)      | 52 (37.1)      | 19 (26.4)      |
| Primary Education              | 137 (64.2)     | 104 (74.3)     | 33 (45.8)      |
| > Primary Education            | 69 (32.5)      | 33 (23.6)      | 36 (50.0)      |
| Married                        | 165 (77.8)     | 105 (75.0)     | 60 (85.7)      |
| Employed                       | 138 (60.3)     | 92 (60.1)      | 46 (61.3)      |
|                                | Median (range) | Median (range) | Median (range) |
| Sum of SEWQ Scores             | 12 (2-18)      | 12 (2-18)      | 13 (2-16)      |
| Perceived Social Support Score | 59 (20-84)     | 59 (21-84)     | 59 (20-80)     |
| Perceived Stress Score         | 19 (1-36)      | 18 (1-36)      | 21 (8-33)      |
| EPDS                           | 8 (0-26)       | 7 (0-25)       | 9 (0-26)       |
| PRA-Q total Score              | 10 (0-24)      | 10 (0-24)      | 12 (2-24)      |

GA, gestational age; PS, perceived stress; SEW-Q, Socio-Economic Welfare Questionnaire; EDPS, Edinburgh Postnatal Depression Scale; PRA-Q, Pregnancy-Related Anxiety Questionnaire

In the primary analysis, PRA scores were quartiled and only cases from the first and fourth quartile were used (n=90). The first quartile scores ranged from 0-7 and the fourth quartile scores ranged from 13-24. The variables included in the multiple linear regression analyses are shown in Table 1. The results of the primary regression (Table 3) indicated that PS score, EPDS score, and number of people living in the home were significant predictors of PRA ( $R^2=0.339$ ,  $F(3,74)=12.657$ ,  $p=0.000$ ) (adjusted  $R^2=0.312$ ). PS score and EPDS score were positively associated with PRA score, whereas the number of people living in the home was negatively associated with PRA score. There was no indication of multicollinearity as each of these predictors met the criteria for statistical significance ( $p \leq 0.05$ ), had a Variance Inflation Factor of less than 2, and a Tolerance greater than 0.05. While the EPDS is supposed to measure postpartum depression, there is concern the scale contains an anxiety subscale.[35] To account for a potential spurious relationship between this anxiety subscale and PRA, the EPDS scores were recalculated, excluding the scores for two anxiety-related questions. Bivariate analysis indicated the recalculated EPDS scores and full EPDS scored shared the same correlation with PRA score ( $r_s=0.511$ ,  $p=0.000$ ). When the linear regression modeling was re-run using the

## PREGNANCY RELATED ANXIETY IN TANZANIA

14

1  
2  
3 recalculated EPDS scores the model summary was only marginally changed ( $R^2=0.338$ ,  
4  
5  $F(3,74)=2.607$ ,  $p=0.000$ ) (adjusted  $R^2=0.311$ ). The total of the two anxiety questions from the  
6  
7 EPDS was analyzed as a separate variable. This variable showed a positive correlation with PRA  
8  
9 scores ( $r_s=0.422$ ,  $p=0.000$ ) but was not a statistically significant predictor in the regression  
10  
11 models.  
12  
13

14  
15 **Table 3. Regression model of factors associated with PRA score**

|                                 | <i>B</i> | <i>SE B</i> | $\beta$ | <i>t</i> | <i>p</i> |
|---------------------------------|----------|-------------|---------|----------|----------|
| PS Score                        | 0.306    | 0.121       | 0.328   | 2.527    | 0.014    |
| EPDS Score                      | 0.328    | 0.136       | 0.316   | 2.416    | 0.018    |
| Number of people living in home | -0.718   | 0.342       | -0.204  | -2.102   | 0.039    |

21  
22 PS, perceived stress; EDPS, Edinburgh Postnatal Depression Scale

23  
24  
25 In the first supplemental analysis (using all cases,  $n=212$ ), PRA had a significant association  
26  
27 ( $p\leq 0.05$ ) with EPDS score, recalculated EPDS score, PS, SEW-Q score, a history of HIV, and  
28  
29 healthcare facility. The results of this regression analysis were similar to the regression modeling  
30  
31 using the first and fourth quartile PRA scores; results indicated PS score and EPDS score were  
32  
33 statistically significant predictors of PRA ( $R^2=0.196$ ,  $F(2,209)=25.394$ ,  $p=0.000$ ) (adjusted  
34  
35  $R^2=0.188$ ). Both PS score and EPDS score maintained a positive correlation with PRA. This  
36  
37 regression was re-run using the recalculated EPDS scores and the model summary was again  
38  
39 only marginally different ( $R^2=0.195$ ,  $F(2,209)=25.243$ ,  $p=0.000$ ) (adjusted  $R^2=0.187$ ) with the  
40  
41 same final predictors.  
42  
43  
44  
45  
46  
47

48 In the second supplemental bivariate analysis with dichotomized PRA, the number of people  
49  
50 living in the home, PS score, and EPDS scores showed significant associations ( $p\leq 0.05$ ) with  
51  
52 high or low-moderate PRA. Fisher's Exact test showed PRA to have a significant association  
53  
54 with if the mom was born in Mwanza, and if the pregnancy was planned. Eighty-five percent  
55  
56  
57  
58  
59  
60

( $n=11$ ) of the participants with high anxiety had not planned their pregnancy.  $\chi^2$  analysis showed presence of depression (an EPDS score of 13 or higher [29]) was two-fold in women with a high PRA scores (53.8%) compared to women with low PRA scores (27.1%) ( $p=0.04$ ). When EPDS scores were recalculated without the anxiety questions, the presence of depression remained about two-fold in women with high PRA scores compared to women with low PRA scores (23.1% and 11.6% respectively). However, these results were not statistically significant ( $p=0.203$ ).

## DISCUSSION

Twenty-five percent of women in our sample scored 13 or higher (out of a possible 30) on the PRA-Q, and 6.1% of participants met the threshold for “high anxiety”.[34] Regardless of how PRA was operationalized (continuous, dichotomized, or limited to only the highest and lowest scores), EPDS score and PS score consistently had a positive correlation with PRA and were significant predictors in the regression models. Current literature substantiates the identified association between depression and PRA.[1, 13] Pregnant women more commonly experience co-morbid anxiety and depression rather than one of these afflictions alone.[13, 36] However, there appears to be limited understanding of why this comorbidity exists and which develops first, depression or anxiety. Consideration of the Theory of Stress, Appraisal, and Coping [19] combined with the nuances of this sample’s cultural context provides insight in this inquiry. Lazarus and Folkman [19] posit that stress results when an event is appraised as a possible threat to one’s well-being and the resources to mitigate the event are deemed unattainable. Moreover, factors such as novelty and time proximity to the event can affect the perception of the threat’s severity.[19] In accordance with this theory, the lack of basic health knowledge, coupled with

## PREGNANCY RELATED ANXIETY IN TANZANIA

16

1  
2  
3 restricted access to healthcare facilities, and the low socio-economic standing of most  
4  
5 Tanzanians creates an environment where pregnancy could commonly result in stress or  
6  
7 anxiety.[17, 20] Moreover, social customs in Tanzania deter the discussion of personal matters  
8  
9 with anyone: friends, family, or spouses.[20] A phenomenological study used a subsample of our  
10  
11 participants to explore moderate to severe PRA. This study identified common feelings of  
12  
13 isolation and alienation amongst participants as their anxiety worsened and there was no  
14  
15 perceived acceptable forum to discuss their fears; ultimately, women endorsed the isolation  
16  
17 evolving into sadness.[20, 37] Even in cases where women surrounded themselves with family,  
18  
19 there was still a reluctance to discuss their concerns. Our primary analysis revealed a negative  
20  
21 correlation between number of people living in the home and PRA. More people in the home  
22  
23 increases the likelihood that the mother has someone she may feel comfortable talking to. It is  
24  
25 therefore conceivable that in this populace, severe PRA may trigger an internal conflict of  
26  
27 wanting to express these fears while worrying that this is not acceptable, which results in feelings  
28  
29 of isolation and subsequent depression.  
30  
31  
32  
33  
34  
35  
36  
37

38 Interestingly, the factors most commonly associated with PRA in current literature did not hold  
39  
40 significance in this study. Socio-economic welfare score showed a significant correlation with  
41  
42 PRA only when all participants were used and PRA was a continuous variable. When PRA  
43  
44 scores were dichotomized or only participants with the PRA scores in the first and fourth quartile  
45  
46 were used, the correlation with socio-economic welfare score lost statistical significance, and did  
47  
48 not show significant predictive properties. Perceived social support score, marital status, and  
49  
50 mother's occupation also failed to have a significant association. Active depression is the only  
51  
52 factor found to predict PRA in our study which is also consistently correlated to PRA in current  
53  
54  
55  
56  
57  
58  
59  
60

## PREGNANCY RELATED ANXIETY IN TANZANIA

17

1  
2  
3 literature.[1, 13] Our findings are remarkably contrary to the current literature, which  
4  
5 consistently lists social supports, ethnicity, and economic status as key risk factors.[2, 15, 16]  
6  
7 Our findings serve as a caution to generalize findings on PRA from high-income countries to  
8  
9 populations in LMIC. These gross variations from current research may reflect the limited  
10  
11 research available from LMIC.[18]  
12  
13  
14  
15  
16

17 We identified only two studies (each with two articles), one from India and the other from  
18  
19 Tanzania, which used the pregnancy-specific anxiety inventory [14, 38] and PRA-Q [13,  
20  
21 Rwakarema 2013 unpublished] to measure PRA, respectively. In the India study, younger age  
22  
23 and not living with extended family were associated with higher PRA.[14, 38] Comparatively,  
24  
25 results of the current study found no statistically significant relationship with the mothers' age in  
26  
27 any of the analyses (primary or secondary). Number of people living in the home was not  
28  
29 statistically significant in either analysis where PRA was maintained as a continuous variable  
30  
31 (primary or first supplemental). When PRA was dichotomized, however, number of people  
32  
33 living in the home showed statistically significant negative correlation with PRA. The nature of  
34  
35 relationship between the mother and people living in the home was not examined in the current  
36  
37 study thus comparison between our study and the India study is difficult. In the Tanzanian study,  
38  
39 PRA was noted to have a statistically significant relationship with prenatal depression.[13,  
40  
41 Rwakarema 2013 unpublished] The Tanzanian study was examining factors associated with  
42  
43 antenatal depression, consequently the underlying aim of the study was different (i.e., clinical  
44  
45 heterogeneity).  
46  
47  
48  
49  
50  
51  
52  
53  
54  
55  
56  
57  
58  
59  
60



## PREGNANCY RELATED ANXIETY IN TANZANIA

18

1  
2  
3 Despite the vast differences in culture and socioeconomic standing it makes sense that globally,  
4 women can experience the same condition, PRA, for different reasons. Pregnancy and childbirth  
5 have high-risk of death for the mother and baby in Tanzania.[39] The neonatal mortality rate is  
6 about 26 for every 1000 lives births and the maternal mortality rate of 398-454 for every 100000  
7 lives births.[39] In the previously mentioned phenomenological study, fears about health during  
8 pregnancy was a commonly noted factor contributing to PRA.[20, 37] High likelihood of death  
9 may be an unfortunate reality for populations in LMIC resulting in a fear of death having a  
10 greater effect on overall PRA than in women from high-income counties. With the  
11 multidimensional nature of PRA, women may assign greater emphasis on different domains of  
12 PRA based on issues most relevant for their cultural context.[40]  
13  
14  
15  
16  
17  
18  
19  
20  
21  
22  
23  
24  
25  
26  
27

28 The notion of novelty can critically change the perceived threat in an event.[19] Pregnancy may  
29 be uniquely novel in its accompaniment of physiological and psychological emotional  
30 investment coupled with the distinct outcome of creating human life. One possible explanation is  
31 that pregnancy may hold an unparalleled element of novelty (thus propensity to induce anxiety)  
32 regardless of a women's background or gravidity. Differences in social norms and fundamental  
33 values, however, may change what someone considers threatening or stressful.[19] In the context  
34 of this study, socio-cultural norms such as dynamics between men and women may change the  
35 effect of social supports on PRA scores. The subsample of women enrolled in the  
36 phenomenological study of PRA often described their husbands growing distant during the  
37 pregnancy, which had an exacerbating effect on their anxiety rather than calming.[20] Many of  
38 the fears voiced by women in Tanzania were due to limited basic health and pregnancy  
39 knowledge; many times normal sensations resulted in fear of death for the mother or baby.[20]  
40  
41  
42  
43  
44  
45  
46  
47  
48  
49  
50  
51  
52  
53  
54  
55  
56  
57  
58  
59  
60

1  
2  
3 These differences in findings outline the need for more research exploring the notion of PRA in  
4  
5 LMIC and between LMIC and high-income countries.  
6  
7  
8  
9

### 10 **Limitations**

11  
12 Convenience sampling was employed and consequently results cannot be generalized to all  
13  
14 pregnant women in the Ilemela and Nyamagana districts of Tanzania. Moreover, the lack of  
15  
16 comparable studies in LMIC makes it difficult to identify potential anomalies in these findings.  
17  
18 There are no standardized screening tools for PRA or commonly accepted categorization  
19  
20 methods for the tools available [40] making it difficult to compare findings between studies or  
21  
22 compare characteristics between levels of severity of PRA. Moreover, within current literature  
23  
24 there is no empirically tested way to operationalize PRA scores. The PRA-Q examines broad  
25  
26 concepts of PRA making it an effective screening tool but difficult to identify severity of PRA or  
27  
28 clinical diagnoses.[40, 41] This was a secondary data analysis limiting variable options to those  
29  
30 already included in the longitudinal study. Findings in the regression modeling only explain 20-  
31  
32 34% of the change in PRA scores across our sample. Consequently, there are still significant  
33  
34 factors not identified in this study.  
35  
36  
37  
38  
39  
40  
41

### 42 **CONCLUSION**

43  
44 Active depression is one of the only factors consistently correlated to PRA in both our study and  
45  
46 current literature. Given the socio-cultural differences between populations in high-income  
47  
48 countries and LMIC, the unique psychological complexities of pregnancy, and the personal  
49  
50 nature of how people assess events as stressful, findings should not be generalized across these  
51  
52 populations. Ultimately, more research is needed on PRA universally and the reason for  
53  
54  
55  
56  
57  
58  
59  
60

1  
2  
3 comorbidity between depression and PRA. In LMIC, before predictive factors and prevention  
4 strategies can be identified, further fundamental exploration of PRA is needed to better  
5 understand how this phenomenon fits within these socio-cultural settings.  
6  
7  
8  
9

10  
11  
12 **Contributions:** VW, and SSP worked together to develop the research question, study design,  
13 and analytic plan. SSP, NL and GM provided consultation from the research design through to  
14 the manuscript development, and directed the analysis of the study. ECN, local lead in Mwanza,  
15 translated documents, obtained ethics approval, and supervised research assistants. All authors  
16 have contributed to the work and approved the manuscript.  
17  
18  
19  
20  
21  
22  
23

24 **Funding:** The University of Calgary Research Grant (URGC) Program, SEED Grant, funded the  
25 larger quantitative study. VW's graduate studies was support by scholarships including Entrance  
26 scholarship for Master of Nursing Program, Faculty of Nursing Graduate Entrance Scholarship,  
27 Queens Elizabeth II Scholarship and Graduate Knowledge Translation Assistantship from  
28 Faculty of Nursing.  
29  
30  
31  
32  
33  
34

35 **Acknowledgements:** The authors would like to thank the research team in Mwanza, Tanzania  
36 who completed the larger quantitative study, including affiliates with the Catholic University of  
37 Health and Allied Sciences. The primary author would like acknowledge the research team's  
38 hard work and allowing the use of the data to complete this analysis. We would also like to thank  
39 and acknowledge the women of Tanzania who took time to participate in the study and allowed  
40 us to learn from their lives and experiences.  
41  
42  
43  
44  
45  
46  
47  
48

49 **Competing interests:** None declared  
50  
51  
52  
53  
54  
55  
56  
57  
58  
59  
60

1  
2  
3 **Ethics approval:** University of Calgary Conjoint Health Research Ethics Board (REB13-0399:  
4 larger study; REB14-0660: this study; and REB14-0660-MOD-1: to include postpartum women)  
5  
6 and the Catholic University of Health and Allied Sciences.  
7  
8

9  
10 **Data sharing statement:** The dataset generated during our study are not publicly available as  
11 consent for secondary use was not obtained from study participants. Please contact the  
12  
13 corresponding author for additional information.  
14  
15  
16  
17  
18  
19  
20  
21  
22  
23  
24  
25  
26  
27  
28  
29  
30  
31  
32  
33  
34  
35  
36  
37  
38  
39  
40  
41  
42  
43  
44  
45  
46  
47  
48  
49  
50  
51  
52  
53  
54  
55  
56  
57  
58  
59  
60

## REFERENCES

1. Huizink AC, Mulder EJ, Robles de Medina PG, *et al.* Is pregnancy anxiety a distinctive syndrome? *Early Hum Dev* 2004;79(2):81-91.
2. Dunkel Schetter C. Psychological science on pregnancy: stress processes, biopsychosocial models, and emerging research issues. *Annu Rev Psychol* 2011;62:531-58. doi: 10.1146/annurev.psych.031809.130727.
3. Dunkel Schetter C, Tanner L. Anxiety, depression and stress in pregnancy: implications for mothers, children, research, and practice. *Curr Opin Psychiatry* 2012;25(2):141-8. doi: 10.1097/YCO.0b013e3283503680.
4. Guardino CM, Dunkel Schetter C. Understanding pregnancy anxiety. *Zero to Three* 2014;35(3):12-22.
5. Glynn LM, Schetter CD, Hobel CJ, *et al.* Pattern of perceived stress and anxiety in pregnancy predicts preterm birth. *Health Psychol* 2008;27(1):43-51. doi: <http://dx.doi.org/10.1037/0278-6133.27.1.43>.
6. Rose MS, Pana G, Premji S. Prenatal maternal anxiety as a risk factor for preterm birth and the effects of heterogeneity on this relationship: a systematic review and meta-analysis. *Biomed Res Int* 2016;2016:8312158. doi: 10.1155/2016/8312158.
7. Beck S, Wojdyla D, Say L, *et al.* The worldwide incidence of preterm birth: a systematic review of maternal mortality and morbidity. *Bull World Health Organ* 2010;88(1):31-8. doi: 10.2471/BLT.08.062554.
8. Arch JJ. Pregnancy-specific anxiety: which women are highest and what are the alcohol-related risks? *Compr Psychiatry* 2013;54(3):217-28. doi: 10.1016/j.comppsy.2012.07.010.

- 1  
2  
3 9. Fleuriet KJ, Sunil TS. Perceived social stress, pregnancy-related anxiety, depression and  
4 subjective social status among pregnant Mexican and Mexican American women in south  
5 Texas. *J Health Care Poor Underserved* 2014;25(2):546-61. doi:  
6  
7 10.1353/hpu.2014.0092.  
8  
9
- 10 10. Jolly J, Walker J, Bhabra K. Subsequent obstetric performance related to primary mode  
11 of delivery. *Br J Obstet Gynaecol* 1999;106(3):227-32.  
12
- 13 11. Rubertsson C, Hellstrom J, Cross M, *et al.* Anxiety in early pregnancy: prevalence and  
14 contributing factors. *Arch Womens Health* 2014;17(3):221-8.  
15
- 16 12. The World Bank [Internet]. World bank country and lending groups. World Bank Group;  
17 n.d. Available from: [https://datahelpdesk.worldbank.org/knowledgebase/articles/906519-](https://datahelpdesk.worldbank.org/knowledgebase/articles/906519-world-bank-country-and-lending-groups)  
18 [world-bank-country-and-lending-groups](https://datahelpdesk.worldbank.org/knowledgebase/articles/906519-world-bank-country-and-lending-groups) [accessed 5 October 2017].  
19
- 20 13. Rwakarema M, Premji SS, Nyanza EC, *et al.* Antenatal depression is associated with  
21 pregnancy-related anxiety, partner relations, and wealth in women in Northern Tanzania:  
22 a cross-sectional study. *BMC Women's Health* 2015;15:68.  
23
- 24 14. Madhavanprabhakaran GK, D'Souza MS, Nairy KS. Prevalence of pregnancy anxiety  
25 and associated factors. *International Journal of Africa Nursing Sciences* 2015;3:1-7. doi:  
26 10.1016/j.ijans.2015.06.002.  
27
- 28 15. Gurung RAR, Dunkel-Schetter C, Collins N, *et al.* Psychosocial predictors of prenatal  
29 anxiety. *J Soc Clin Psychol* 2005;24:497-519.  
30
- 31 16. Lee AM, Lam SK, Sze Mun Lau SM, *et al.*, Prevalence, course, and risk factors for  
32 antenatal anxiety and depression. *Obstet Gynecol* 2007;110(5):1102-12.  
33
- 34 17. United States of America Central Intelligence Agency. The World Factbook: Africa  
35 Tanzania. The Center of Intelligence Agency; 2016. Available from  
36  
37  
38  
39  
40  
41  
42  
43  
44  
45  
46  
47  
48  
49  
50  
51  
52  
53  
54  
55  
56  
57  
58  
59  
60

- 1  
2  
3 <https://www.cia.gov/library/publications/the-world-factbook/geos/tz.html> [accessed 5  
4  
5  
6  
7  
8  
9  
10  
11  
12  
13  
14  
15  
16  
17  
18  
19  
20  
21  
22  
23  
24  
25  
26  
27  
28  
29  
30  
31  
32  
33  
34  
35  
36  
37  
38  
39  
40  
41  
42  
43  
44  
45  
46  
47  
48  
49  
50  
51  
52  
53  
54  
55  
56  
57  
58  
59  
60
18. Fisher J, Cabral de Mello M, Patel V, *et al.* Prevalence and determinants of common perinatal mental disorders in women in low- and lower-middle-income countries: a systematic review. *Bull World Health Organ* 2012;90(2):139G-49H. doi: 10.2471/BLT.11.091850.
19. Lazarus RS, Folkman S. Stress, appraisal, and coping. New York, NY: Springer; 1984.
20. King Rosario, Premji SS, Nyanza EC, *et al.* A qualitative study of pregnancy-related anxiety among women in Tanzania. *BMJ Open* 2017;7:e016072. doi: 10.1136/bmjopen-2017-016072.
21. Stokols D. Establishing and maintaining healthy environments: toward a social ecology of health promotion. *Am Psychol* 1992;47(1):6-22. doi: 10.1037/0003-066X.47.1.6.
22. Rini CK, Dunkel-Schetter C, Wadhwa PD, *et al.* Psychological adaptation and birth outcomes: the roles of personal resources, stress, and sociocultural context in pregnancy. *Health Psychol* 1999;18(4):333-45.
23. Wadhwa PD, Sandman CA, Porto M, *et al.* The association between prenatal stress and infant birth weight and gestational age at birth: a prospective investigation. *Am J Obst Gynecol* 1993;169(4):858-65. doi: [http://dx.doi.org/10.1016/0002-9378\(93\)90016-C](http://dx.doi.org/10.1016/0002-9378(93)90016-C).
24. Rutstein S, Johnson K. The DHS wealth index. DHS Comparative Reports No 6. Calverton, MD: ORC Macro 2004.
25. Hardan-Khalil K, Mayo AM. Psychometric properties of the multidimensional scale of perceived social support. *Clinical Nurse Specialist* 2015;29(5):258-61. doi: 10.1097/NUR.000000000000148.

- 1  
2  
3 26. Cohen SC, Kamarck T, Mermelstein R. A global measure of perceived stress. *J Health*  
4  
5 *Soc Behav* 1983;24(4):385-96.  
6  
7  
8 27. Lee E-H. Review of the psychometric evidence of the perceived stress scale. *Asian Nur*  
9  
10 *Res* 2012;6(4):121-7. doi: 10.1016/j.anr.2012.08.004.  
11  
12 28. Bunevicius R, Bunevicius A, Kusminskas L. P02-206 Validity of the Edinburgh postnatal  
13  
14 depression scale. *Eur Psychiat* 2009;24:S896-S. doi: 10.1016/S0924-9338(09)71129-0.  
15  
16  
17 29. Cox J, Holden J, Sagovsky R. Detection of postnatal depression: development of the 10-  
18  
19 item Edinburgh Postnatal Depression Scale. *Br J Psychiatry* 1987;150:782-6.  
20  
21  
22 30. Navarro P, Ascaso BS, Garcia-Esteve L, *et al.* Postnatal psychiatric morbidity: a  
23  
24 validation study of the GHQ-12 and the EPDS as screening tools. *Gen Hosp Psychiatry*  
25  
26 2007;29(1):1-7. doi: 10.1016/j.genhosppsy.2006.10.004.  
27  
28  
29 31. Rwakarema M, Premji S, Nyanza E, *et al.* Antenatal depression is associated with  
30  
31 pregnancy-related anxiety, partner relations, and wealth in women in Northern Tanzania:  
32  
33 a cross-sectional study. *BMC Women's Health* 2015;15:68. doi: 10.1186/s12905-015-  
34  
35 0225-y.  
36  
37  
38 32. Tsai AC, Scott JA, Hung KJ, *et al.* Reliability and validity of instruments for assessing  
39  
40 perinatal depression in African settings: systematic review and meta-analysis. *PLoS One*  
41  
42 2013;8(12):e82521. Epub 2013/12/10. doi: 10.1371/journal.pone.0082521.  
43  
44  
45 33. Hosmer DW, Lemeshow S, Sturdivant RX. Applied logistic regression (3<sup>rd</sup> ed.).  
46  
47 Hoboken, New Jersey: Wiley 2013.  
48  
49  
50 34. Fairlie TG, Gillman MW, Rich-Edwards J. High pregnancy-related anxiety and prenatal  
51  
52 depressive symptoms as predictors of intention to breastfeed and breastfeeding initiation.  
53  
54 *J Women's Health* 2009;18(7):945-53. doi: 10.1089/jwh.2008.0998.  
55  
56  
57  
58  
59



- 1  
2  
3 35. Brouwers EPM, van Baar AL, Pop VJM. Does the Edinburgh Postnatal Depression Scale  
4 measure anxiety? *J Psychosom Res* 2001;51(5):659-63. doi: 10.1016/S0022-  
5  
6 3999(01)00245-8.  
7  
8  
9  
10 36. Field, Diego M, Hernandez-Reif M, *et al.* Comorbid depression and anxiety effects on  
11 pregnancy and neonatal outcome. *Infant Beh Dev* 2010;33(1):23-9. doi:  
12  
13 10.1016/j.infbeh.2009.10.004.  
14  
15  
16  
17 37. King Rosario. Pregnancy-related anxiety in Mwanza, Tanzania: a qualitative approach  
18 [Masters thesis]. Univeristy of Calgary, 2016.  
19  
20  
21 38. Madhavanprabhakaran GK, Kumar KA, Ramasubramaniam S, *et al.* Effects of pregnancy  
22 related anxiety on labour outcomes: a prospective cohort study. *Journal of Research in*  
23  
24 *Nursing and Midwifery* 2013;2(7). doi: 10.14303/jrnm.2013.061.  
25  
26  
27  
28 39. UNICEF. Tanzania's progress in maternal and child health. UNICEF Tanzania; 2010.  
29 Available from: [https://www.unicef.org/tanzania/6906\\_10741.html](https://www.unicef.org/tanzania/6906_10741.html) [accessed 1  
30  
31  
32  
33  
34  
35  
36 40. Bayrampour H, Ali E, McNeil DA, Benzies K, MacQueen G, Tough S. Pregnancy-  
37 related anxiety: A concept analysis. *International journal of nursing studies*. 2016;55:115-  
38  
39 30. doi: 10.1016/j.ijnurstu.2015.10.023.  
40  
41  
42 41. Evans K, Spiby H, Morrell CJ. A psychometric systematic review of self-report  
43 instruments to identify anxiety in pregnancy. *Journal of Advanced Nursing*.  
44  
45 2015;71(9):1986-2001. doi: 10.1111/jan.12649.  
46  
47  
48  
49  
50  
51  
52  
53  
54  
55  
56  
57  
58  
59  
60

**LEGEND****Tables**

- Table 1. Variable selected for bivariate analysis
- Table 2. Demographic characteristics
- Table 3. Regression model of factors associated with PRA score

**Figures**

- Figure 1. Recruitment flow diagram

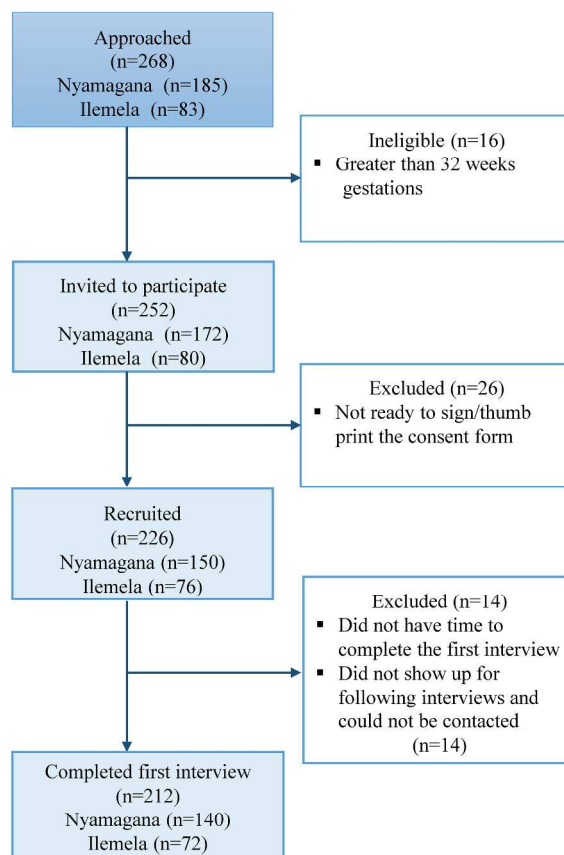

Figure 1. Recruitment flow diagram

254x338mm (300 x 300 DPI)

**STROBE 2007 (v4) checklist of items to be included in reports of observational studies in epidemiology\***  
**Checklist for cohort, case-control, and cross-sectional studies (combined)**

| Section/Topic             | Item # | Recommendation                                                                                                                                                                                                                                                                                                                                                                                                                                                         | Reported on page # |
|---------------------------|--------|------------------------------------------------------------------------------------------------------------------------------------------------------------------------------------------------------------------------------------------------------------------------------------------------------------------------------------------------------------------------------------------------------------------------------------------------------------------------|--------------------|
| Title and abstract        | 1      | (a) Indicate the study's design with a commonly used term in the title or the abstract                                                                                                                                                                                                                                                                                                                                                                                 | 1-2                |
|                           |        | (b) Provide in the abstract an informative and balanced summary of what was done and what was found                                                                                                                                                                                                                                                                                                                                                                    | 2                  |
| <b>Introduction</b>       |        |                                                                                                                                                                                                                                                                                                                                                                                                                                                                        |                    |
| Background/rationale      | 2      | Explain the scientific background and rationale for the investigation being reported                                                                                                                                                                                                                                                                                                                                                                                   | 4-6                |
| Objectives                | 3      | State specific objectives, including any pre-specified hypotheses                                                                                                                                                                                                                                                                                                                                                                                                      | 6                  |
| <b>Methods</b>            |        |                                                                                                                                                                                                                                                                                                                                                                                                                                                                        |                    |
| Study design              | 4      | Present key elements of study design early in the paper                                                                                                                                                                                                                                                                                                                                                                                                                | 6-7                |
| Setting                   | 5      | Describe the setting, locations, and relevant dates, including periods of recruitment, exposure, follow-up, and data collection                                                                                                                                                                                                                                                                                                                                        | 7-8                |
| Participants              | 6      | (a) <i>Cohort study</i> —Give the eligibility criteria, and the sources and methods of selection of participants. Describe methods of follow-up<br><i>Case-control study</i> —Give the eligibility criteria, and the sources and methods of case ascertainment and control selection. Give the rationale for the choice of cases and controls<br><i>Cross-sectional study</i> —Give the eligibility criteria, and the sources and methods of selection of participants | 7-8                |
|                           |        | (b) <i>Cohort study</i> —For matched studies, give matching criteria and number of exposed and unexposed<br><i>Case-control study</i> —For matched studies, give matching criteria and the number of controls per case                                                                                                                                                                                                                                                 | N/A                |
| Variables                 | 7      | Clearly define all outcomes, exposures, predictors, potential confounders, and effect modifiers. Give diagnostic criteria, if applicable                                                                                                                                                                                                                                                                                                                               | 8-10               |
| Data sources/ measurement | 8*     | For each variable of interest, give sources of data and details of methods of assessment (measurement). Describe comparability of assessment methods if there is more than one group                                                                                                                                                                                                                                                                                   | 8-9                |
| Bias                      | 9      | Describe any efforts to address potential sources of bias ( <b><i>systematic sampling to reduce selection bias</i></b> )                                                                                                                                                                                                                                                                                                                                               | 7                  |
| Study size                | 10     | Explain how the study size was arrived at ( <b><i>convenience sample</i></b> )                                                                                                                                                                                                                                                                                                                                                                                         | 7                  |
| Quantitative variables    | 11     | Explain how quantitative variables were handled in the analyses. If applicable, describe which groupings were chosen and why                                                                                                                                                                                                                                                                                                                                           | 9-10               |
| Statistical methods       | 12     | (a) Describe all statistical methods, including those used to control for confounding                                                                                                                                                                                                                                                                                                                                                                                  | 9-11               |
|                           |        | (b) Describe any methods used to examine subgroups and interactions                                                                                                                                                                                                                                                                                                                                                                                                    | 11                 |
|                           |        | (c) Explain how missing data were addressed                                                                                                                                                                                                                                                                                                                                                                                                                            | N/A                |
|                           |        | (d) <i>Cohort study</i> —If applicable, explain how loss to follow-up was addressed<br><i>Case-control study</i> —If applicable, explain how matching of cases and controls was addressed                                                                                                                                                                                                                                                                              | N/A                |

|                          |     |                                                                                                                                                                                                              |       |
|--------------------------|-----|--------------------------------------------------------------------------------------------------------------------------------------------------------------------------------------------------------------|-------|
|                          |     | <i>Cross-sectional study</i> —If applicable, describe analytical methods taking account of sampling strategy                                                                                                 |       |
|                          |     | (e) Describe any sensitivity analyses ( <b>supplemental analyses conducted</b> )                                                                                                                             | 11    |
| <b>Results</b>           |     |                                                                                                                                                                                                              |       |
| Participants             | 13* | (a) Report numbers of individuals at each stage of study—eg numbers potentially eligible, examined for eligibility, confirmed eligible, included in the study, completing follow-up, and analysed            | 12    |
|                          |     | (b) Give reasons for non-participation at each stage                                                                                                                                                         | N/A   |
|                          |     | (c) Consider use of a flow diagram                                                                                                                                                                           | N/A   |
| Descriptive data         | 14* | (a) Give characteristics of study participants (eg demographic, clinical, social) and information on exposures and potential confounders                                                                     | 12    |
|                          |     | (b) Indicate number of participants with missing data for each variable of interest                                                                                                                          | N/A   |
|                          |     | (c) <i>Cohort study</i> —Summarise follow-up time (eg, average and total amount)                                                                                                                             | N/A   |
| Outcome data             | 15* | <i>Cohort study</i> —Report numbers of outcome events or summary measures over time                                                                                                                          | N/A   |
|                          |     | <i>Case-control study</i> —Report numbers in each exposure category, or summary measures of exposure                                                                                                         | N/A   |
|                          |     | <i>Cross-sectional study</i> —Report numbers of outcome events or summary measures                                                                                                                           | 12-13 |
| Main results             | 16  | (a) Give unadjusted estimates and, if applicable, confounder-adjusted estimates and their precision (eg, 95% confidence interval). Make clear which confounders were adjusted for and why they were included | 12-14 |
|                          |     | (b) Report category boundaries when continuous variables were categorized                                                                                                                                    | 12-13 |
|                          |     | (c) If relevant, consider translating estimates of relative risk into absolute risk for a meaningful time period                                                                                             | N/A   |
| Other analyses           | 17  | Report other analyses done—eg analyses of subgroups and interactions, and sensitivity analyses                                                                                                               | 14    |
| <b>Discussion</b>        |     |                                                                                                                                                                                                              |       |
| Key results              | 18  | Summarise key results with reference to study objectives                                                                                                                                                     | 14-17 |
| Limitations              | 19  | Discuss limitations of the study, taking into account sources of potential bias or imprecision. Discuss both direction and magnitude of any potential bias                                                   | 17    |
| Interpretation           | 20  | Give a cautious overall interpretation of results considering objectives, limitations, multiplicity of analyses, results from similar studies, and other relevant evidence                                   | 18    |
| Generalisability         | 21  | Discuss the generalisability (external validity) of the study results                                                                                                                                        | 17    |
| <b>Other information</b> |     |                                                                                                                                                                                                              |       |
| Funding                  | 22  | Give the source of funding and the role of the funders for the present study and, if applicable, for the original study on which the present article is based                                                | 18    |

\*Give information separately for cases and controls in case-control studies and, if applicable, for exposed and unexposed groups in cohort and cross-sectional studies.

**Note:** An Explanation and Elaboration article discusses each checklist item and gives methodological background and published examples of transparent reporting. The STROBE checklist is best used in conjunction with this article (freely available on the Web sites of PLoS Medicine at <http://www.plosmedicine.org/>, Annals of Internal Medicine at <http://www.annals.org/>, and Epidemiology at <http://www.epidem.com/>). Information on the STROBE Initiative is available at [www.strobe-statement.org](http://www.strobe-statement.org).
